1

2       **Strain-level differences in gut microbiome composition determine**  
3       **fecal IgA levels and are modifiable by gut microbiota manipulation**

4

5       Chao Yang,<sup>1,2</sup> Ilaria Mogno,<sup>1,2</sup> Eduardo J. Contijoch,<sup>1,2</sup> Joshua N. Borgerding,<sup>1</sup> Varun  
6       Aggarwala,<sup>1,2</sup> Zhihua Li,<sup>2</sup> Emilie K. Grasset,<sup>1,6</sup> Drew S. Helmus<sup>3</sup>, Marla C. Dubinsky<sup>3</sup>, Saurabh  
7       Mehandru,<sup>1</sup> Andrea Cerutti,<sup>1,4,5</sup> and Jeremiah J. Faith<sup>1,2,\*</sup>

8

9       <sup>1</sup>Precision Immunology Institute, Icahn School of Medicine at Mount Sinai, New York, NY 10029,  
10       USA

11       <sup>2</sup>Institute for Genomics and Multiscale Biology, Icahn School of Medicine at Mount Sinai, New  
12       York, NY 10029, USA

13       <sup>3</sup>Pediatric Gastroenterology and Hepatology, Department of Pediatrics, Susan and Leonard  
14       Feinstein IBD Clinical Center, Icahn School of Medicine at Mount Sinai, New York, NY 10029,  
15       USA

16       <sup>4</sup>Program for Inflammatory and Cardiovascular Disorders, Institut Hospital del Mar  
17       d'Investigacions Mediques (IMIM), Barcelona 08003, Spain

18       <sup>5</sup>Catalan Institute for Advanced Studies (ICREA), Barcelona 08003, Spain

19       <sup>6</sup>Department of Medicine, Center for Molecular Medicine, Karolinska Institutet, Karolinska  
20       University Hospital, SE-171 77 Stockholm, Sweden

21

22       \*Correspondence: [jeremiah.faith@mssm.edu](mailto:jeremiah.faith@mssm.edu) (J.J.F.)

23

24       **Keywords**

25       Gut microbiota, Immunoglobulin A, *Bacteroides ovatus*, Fecal Microbiota Transplantation,  
26       Immune modulation

27 **Abstract**

28 Fecal IgA production depends on colonization by a gut microbiota. However, the bacterial  
29 strains that drive gut IgA production remain largely unknown. By accessing the IgA-inducing  
30 capacity of a diverse set of human gut microbial strains, we identified *Bacteroides ovatus* as the  
31 species that best induced gut IgA production. However, this induction varied bimodally across  
32 different *B. ovatus* strains. The high IgA-inducing *B. ovatus* strains preferentially elicited more  
33 IgA production in the large intestine through both T-cell-dependent and T-cell-independent B  
34 cell-activation pathways. Remarkably, a low-IgA phenotype in mice could be robustly and  
35 consistently converted into a high-IgA phenotype by transplanting a multiplex cocktail of high  
36 IgA-inducing *B. ovatus* strains but not individual ones. Thus, microbial strain specificity is  
37 essential for the optimal induction of high-IgA responses in the gut. Our results highlight the  
38 critical importance of microbial strains in driving phenotype variation in the mucosal immune  
39 system and provide a strategy to robustly modify a gut immune phenotype, including IgA  
40 production.

41

## 42 Introduction

43 Immunoglobulin A (IgA) is the most abundant mucosal antibody and plays an essential role in  
44 maintaining gut homeostasis as well as other physiological processes<sup>1-3</sup>. Secretory IgA, for  
45 example, can limit the access of bacteria and bacteria-derived toxins to intestinal epithelial  
46 cells<sup>4,5</sup>, facilitate the clearance of bacteria that have breached the mucosal barrier<sup>6-8</sup> and  
47 regulate the colonization of bacteria in the mucosal lining<sup>9,10</sup>. In addition, IgA can also bind  
48 disease-associated gut microbiota<sup>11-13</sup>. Conversely, the gut microbiota and its metabolites drive  
49 the production of IgA as germ-free (GF) mice have an almost undetectable level of fecal IgA<sup>14</sup>.  
50 Upon bacteria colonization, even with a single bacterial strain<sup>15-17</sup>, B cells undergo class-switch  
51 to IgA<sup>+</sup> cells in gut-associated lymphoid tissues (GALT), which include Peyer's patches (PP),  
52 isolated lymphoid follicles (ILF) and mesenteric lymph nodes (MLN), and in the gut lamina  
53 propria (LP)<sup>8,18</sup>. Much of the intestinal IgA is bacteria-specific<sup>15,16,19</sup>, and the B-cell repertoire is  
54 highly influenced by the microbiota composition<sup>20</sup>. To date, a few murine derived bacterial  
55 species have been identified as being able to enhance or reduce intestinal IgA production<sup>21-25</sup>.  
56 However, key questions regarding the impact of microbiota in this process remain largely  
57 unanswered including the importance of colonization order, the contribution of individual  
58 bacterial species versus that of microbial communities, the potential to modulate IgA production  
59 by altering gut microbiota composition with commensal organisms, and the role of each  
60 microbial species in the development of IgA<sup>+</sup> B cells in specific tissues<sup>8,26</sup>.

61 Apart from IgA-secreting cells, the gut microbiota has the capacity to influence numerous  
62 other immune cell populations including colonic regulatory T cells<sup>27-29</sup>, IL-17 producing T helper  
63 cells<sup>30</sup>, and macrophages<sup>31</sup>. Importantly, many of these responses seem to be bacterial strain-  
64 specific as communities with comparable species composition can drive gut immune responses  
65 characterized by largely different cell compositions<sup>32</sup>. These discoveries indicate that  
66 manipulation of the gut microbiota, with appropriate bacterial strains, represents a potential  
67 therapeutic pathway for the treatment of diseases including inflammatory bowel disease,

68 rheumatoid arthritis and multiple sclerosis through shaping the host immune system<sup>33</sup>. Although  
69 the studies of microbiota-based therapeutics (MT) and fecal microbiota transplantation (FMT)  
70 have heavily focused on the engraftment of the transmitted microbiota and its influence on the  
71 composition of the recipient microbiota<sup>34-37</sup>, the clinical application of microbiota manipulation as  
72 an immunomodulatory strategy will require combinations of bacterial strains optimized for the  
73 induction of specific immune phenotypes that are robust to the interpersonal variation in the pre-  
74 existing microbiota of each recipient.

75 Here we demonstrate that, upon transfer into GF mice, human isolates of the *Bacteroides*  
76 *ovatus* species, one of the most common human gut commensals, are uniquely capable of  
77 inducing high mucosal IgA production compared with other common gut commensal species.  
78 This IgA-inducing capacity, however, was restricted to specific strains of *B. ovatus* that  
79 preferentially led to IgA production in the large intestine through both T-cell-dependent (TD) and  
80 T-cell-independent (TI) B cell-activation pathways. While no individual bacterial strain functioned  
81 as an effective enhancer of gut IgA production, we found that cocktails of these high IgA-  
82 inducing (IgA<sup>high</sup>) strains could serve as effective immunomodulators, that elicited higher fecal  
83 IgA levels upon administration to animals harboring a pre-existing microbiota with low IgA-  
84 inducing potential (IgA<sup>low</sup>). Our work demonstrates the importance of strain-level variation in gut  
85 microbiota composition on mucosal immune responses. It also supports the potential utility of  
86 cultured multi-bacterial effector strain cocktails as a strategy to overcome phenotype transfer  
87 resistance in microbiota-based immunomodulation<sup>38</sup>.

88

## 89 **Results**

### 90 ***B. ovatus* elicits robust gut IgA production**

91 To determine if individual gut bacterial species have a distinct IgA-inducing potential, we  
92 monocolonized GF C57BL/6 mice with one of eight different human gut commensal bacteria  
93 ([Supplementary Table 1](#)) with representatives from the most prominent phyla of the human gut  
94 including Firmicutes, Bacteroidetes, Actinobacteria and Proteobacteria<sup>39,40</sup>. After three weeks of  
95 colonization to allow optimal steady-state gut IgA secretion ([Supplementary Fig. 1a](#)), we  
96 measured serum and fecal IgA levels in each group of gnotobiotic mice<sup>16</sup>. Although all tested  
97 species significantly increased IgA level relative to control GF mice, *B. ovatus* monocolonized  
98 mice secreted significantly more IgA in their feces compared with mice colonized with any of the  
99 other seven human gut bacteria ([Fig. 1a](#);  $p < 0.001$ ). Most species also increased serum IgA  
100 ([Supplementary Fig. 1b](#)). However, consistent with previous reports<sup>18</sup>, fecal IgA and serum IgA  
101 levels in these mice did not correlate significantly ([Supplementary Fig. 1c](#);  $R^2 = 0.226$ ;  $p =$   
102  $0.196$ ). GF mice colonized with the cocktail of all eight bacterial species yielded as much fecal  
103 and serum IgA as mice monocolonized with *B. ovatus*.

104 To address if the order of bacterial colonization could influence fecal IgA secretion, GF  
105 mice were sequentially colonized every three weeks with individual species or small cocktails of  
106 the same eight bacterial species. We first assayed fecal IgA level in mice sequentially colonized  
107 with low IgA inducers (e.g. *E. coli*) to high IgA inducers (e.g. *B. ovatus*). Fecal IgA increased  
108 gradually with the colonization of additional bacterial species. However, the more striking (>2-  
109 fold) increase in IgA occurred after colonization with *B. ovatus* ([Fig. 1b](#)). Metagenomic  
110 sequencing of fecal microbiota in these mice revealed gut colonization by each bacterial  
111 species, albeit with different proportions ([Fig. 1c](#)). We then reversed the order of colonization  
112 from high IgA inducers (e.g. *B. ovatus*) to low IgA inducers ([Fig. 1d](#)). Once again, *B. ovatus*  
113 elicited the largest increase of fecal IgA production, while the other species led to smaller  
114 increases ([Fig. 1e](#)). Remarkably, the relative abundance of each organism at the end of the

115 colonization was very similar, regardless of the order of colonization (Fig. 1c,e). These results  
116 demonstrate that *B. ovatus* is a uniquely potent gut IgA inducer and that the species  
117 composition of the gut microbiota impacts IgA production more than the order of bacterial  
118 colonization.

119 To test the role of bacterial viability in the induction of gut IgA by *B. ovatus*<sup>15,41,42</sup>, GF mice  
120 were administered heat-killed *B. ovatus* or *B. ovatus* metabolites (i.e. filtered growth medium  
121 from stationary phase of *B. ovatus* cultures) for three weeks. Neither approach was capable of  
122 enhancing fecal IgA above the level detected in GF mice (Supplementary Fig. 1d). To ensure  
123 the above result was not due to the underdeveloped mucosal immune system of GF mice, we  
124 performed similar experiments by first colonizing GF mice with *E. coli* for three weeks and  
125 subsequently treated these mice with heat-killed *B. ovatus* for an additional three weeks. Again,  
126 we found no significant fecal IgA increase (Supplementary Fig. 1d). Thus, neither dead *B.*  
127 *ovatus* nor its metabolites triggered efficient gut IgA responses in the murine intestine. All  
128 together, live *B. ovatus* species elicited more gut IgA production than other tested gut  
129 commensal bacterial species in GF mice.

130

### 131 ***B. ovatus*-driven gut IgA production is strain-specific**

132 Given the remarkable microbial strain variation across individuals<sup>43-46</sup>, we wondered whether all  
133 *B. ovatus* strains within this common bacterial species induced comparably high fecal IgA. GF  
134 mice monocolonized for three weeks with one of 19 *B. ovatus* strains isolated from 19 different  
135 individuals (Supplementary Table 2) showed a strain-specific gut IgA response (Fig. 1f;  $p <$   
136  $0.0001$  one-way ANOVA). In contrast to the large variability of fecal IgA levels, serum IgA levels  
137 were comparable across mice monocolonized with different *B. ovatus* strains (Supplementary  
138 Fig. 1e). Similarly, the colonization density was also comparable across mice harboring different  
139 *B. ovatus* strains (Supplementary Fig. 1f). This observation suggests that the global density of  
140 each individual strain was not implicated in the genesis of strain-specific differences of gut IgA

141 responses. Of note, the distribution pattern of IgA induction across multiple *B. ovatus* strains  
142 was bimodal (Supplementary Fig. 1g;  $p = 0.0481$  Hartigans' Dip Test), allowing these strains to  
143 be categorized as IgA<sup>high</sup> or IgA<sup>low</sup>. The genomic similarity of *B. ovatus* strains was not a  
144 significant predictor of their IgA<sup>high</sup> and IgA<sup>low</sup> properties (Fig. 1g and Supplementary Table 3),  
145 which suggests that their distinct IgA-inducing function is shared amongst the species rather  
146 than representing an evolutionarily distinct group within the species.

147 To rule out a bias in our preliminary screen for IgA<sup>low</sup> strains within the *Bacteroides* genus,  
148 we assayed whether additional strains could induce high fecal IgA (Fig. 1a). We found no strain-  
149 specific differences in fecal IgA induction when GF mice were monocolonized with three distinct  
150 strains of *B. caccae*, *B. thetaiotaomicron* and *B. vulgatus* (Supplementary Fig. 1h). The IgA-  
151 inducing function of additional common species from the order Bacteroidales, including  
152 *Parabacteroides johnsonii*, *Bacteroides intestinalis* and *Bacteroides fragilis*, were tested but also  
153 induced much less gut IgA than *B. ovatus* (Supplementary Fig. 1h). These results indicate that  
154 the high IgA-inducing ability of *B. ovatus* is unique to this gut bacterial species and only to a  
155 subset of strains.

156 To examine the influence of *B. ovatus* strain variation on host fecal IgA production in the  
157 context of more complex gut microbiotas, we colonized GF mice with one of the seven  
158 microbiota arrayed culture collections originally isolated from different human donors with each  
159 collection consisting of 15-20 unique species<sup>32</sup>. The arrayed culture collections were assembled  
160 to reconstitute a donor microbiota each containing a unique *B. ovatus* strain, which was already  
161 functionally tested by earlier monocolonization (Fig. 1f). We observed a significant positive  
162 correlation between the fecal IgA concentrations induced by an individual *B. ovatus* strain and  
163 the fecal IgA concentrations elicited by a culture collection representing the entire *B. ovatus*-  
164 containing microbiota from the same donor (Fig. 1h;  $R^2 = 0.859$ ,  $p = 0.0027$ ). Again, these  
165 results suggest that the *B. ovatus* strain composition is a major contributor of gut IgA responses  
166 even when considered in the context of complex microbial communities.

167 Unlike inbred laboratory mice housed in a highly controlled environment, human beings,  
168 with different genetic background, are exposed to more complex continuum of factors including  
169 some that were demonstrated to affect fecal IgA production such as genetics and diet<sup>47,48</sup>. To  
170 determine whether *B. ovatus* could drive robust gut IgA responses also in humans, we  
171 measured the fecal concentration of IgA in multiple human donors and correlated this  
172 concentration with that of fecal IgA generated by GF mice monocolonized with a *B. ovatus* strain  
173 isolated from identical donors. Though no significant correlation was observed, there was a  
174 clear trend towards a positive correlation even in an uncontrolled condition (Fig. 1i;  $R^2 = 0.2071$ ,  
175  $p = 0.0765$ ).

176 In total these results demonstrate that a subset of *B. ovatus* strains induce high fecal IgA  
177 levels, which broadly influence the total fecal IgA output of the host even in the context of a  
178 diverse gut microbiota.

179

### 180 **IgA<sup>high</sup> *B. ovatus* strains induce more IgA production in the large intestine**

181 To interrogate the mechanisms underpinning gut IgA induction by different *B. ovatus* strains, GF  
182 mice were colonized with a representative IgA<sup>high</sup> or IgA<sup>low</sup> strain (*B. ovatus* strain *E* and *Q*,  
183 respectively). We quantified bacteria-bound IgA in the stool of mice. Monocolonization with the  
184 IgA<sup>high</sup> strain *E* not only induced more free fecal IgA but also more fecal bacteria-bound IgA than  
185 the IgA<sup>low</sup> strain *Q* did (52.9% vs. 21.0% IgA-coated *B. ovatus*) (Fig. 2a). In contrast, no  
186 significant difference was observed in serum immunoglobulin isotypes (i.e. IgA, IgG1, IgG2a,  
187 IgG2b, IgG3, IgM and IgE) in monocolonized mice harboring either *B. ovatus* strain *E* or *Q*  
188 (Supplementary Fig. 1e, 2a).

189 Fecal IgA mostly derives from polymeric IgA released by IgA<sup>+</sup> plasma cells residing in the  
190 intestinal LP and translocated to the gut lumen across epithelial cells via transcytosis<sup>49</sup>. This  
191 process is mediated by a basolateral IgA (and IgM) transporter termed polymeric  
192 immunoglobulin receptor (pIgR)<sup>49</sup>. Independent groups have reported that the expression of



193 plgR by gut epithelial cells is influenced by bacteria stimulation both *in vivo* and *in vitro*<sup>50,51</sup>. To  
194 determine if *B. ovatus* strain variation impacts fecal IgA level by modulating plgR-mediated  
195 transcytosis, we imaged the expression of plgR by immunofluorescence staining in the small  
196 intestine and the colon of mice colonized with either *B. ovatus* strain *E* (IgA<sup>high</sup>) or *Q* (IgA<sup>low</sup>).  
197 However, no noticeable difference in plgR expression was observed ([Supplementary Fig. 2b](#)).  
198 To further interrogate the mechanism underpinning the increased fecal IgA in *B. ovatus* strain *E*  
199 colonized mice, we then quantified, by histology and flow cytometry, IgA<sup>+</sup> B cells in both small  
200 intestine and the colon. We found more IgA<sup>+</sup> B cells in the colonic LP of mice harboring *B.*  
201 *ovatus* strain *E* compared to mice harboring strain *Q*, while no significant strain-specific  
202 difference was observed in the small intestine ([Fig. 2b,c](#)). Although PPs and MLNs usually serve  
203 as dominant IgA inductive sites<sup>52,53</sup>, we did not observe a significant difference in IgA<sup>+</sup> B cells at  
204 these sites by strain *E* or strain *Q* ([Supplementary Fig. 3](#)).

205         Given the preferential expansion of IgA<sup>+</sup> B cells in the colons of monocolonized mice  
206 harboring *B. ovatus* strain *E*, we then explored whether luminal IgA levels would vary between  
207 small and large intestinal regions. In the small intestine, we found that mice monocolonized with  
208 *B. ovatus* strain *E* or strain *Q* had comparable luminal IgA levels ([Fig. 2d](#)). In contrast, mice  
209 monocolonized with strain *E* had significantly more luminal IgA from cecum to distal colon than  
210 those colonized with strain *Q* ([Fig. 2d](#)). Similar results were also observed across all tested  
211 IgA<sup>high</sup> and IgA<sup>low</sup> *B. ovatus* strains ([Supplementary Fig. 4](#)). Thus, the IgA<sup>high</sup> *B. ovatus* strains  
212 induce more colonic IgA-secreting cells compared to IgA<sup>low</sup> *B. ovatus* strains, which results in  
213 the secretion of more IgA in the large intestinal lumen.

214         To determine if these observations were unique to GF C57BL/6 mice, we recapitulated our  
215 monocolonization strategy in GF Swiss Webster mice and found that fecal IgA was largely  
216 comparable in gnotobiotic C57BL/6 and Swiss Webster mice colonized with identical bacterial  
217 strains ([Supplementary Fig. 5a-d](#);  $R^2 = 0.601$ ,  $p = 0.0011$ ). Moreover, IgA<sup>high</sup> strain colonized  
218 gnotobiotic Swiss Webster mice also secreted more intraluminal IgA in the large intestine

219 compared with IgA<sup>low</sup> strain colonized mice ([Supplementary Fig. 5e](#)). Thus, bacteria-induced gut  
220 IgA production is similar across different host genetic backgrounds.

221

### 222 ***B. ovatus* elicits gut IgA production via both TD and TI B cell-activation pathways**

223 Gut IgA responses occur through TD or TI B cell-activation pathways<sup>52,54</sup>. To determine the  
224 influence of CD4<sup>+</sup> T cells on the gut IgA production induced by *B. ovatus*, we depleted CD4<sup>+</sup> T  
225 cells in mice by injecting with an anti-CD4 antibody five days prior to and for three weeks after  
226 monocolonization with *B. ovatus* strain *E* ([Fig. 3a](#) and [Supplementary Fig. 6a-c](#)). On day seven  
227 post-colonization, fecal IgA increased in both T cell-depleted and T cell-sufficient gnotobiotic  
228 mice, which suggests that CD4<sup>+</sup> T cells are not a dominant factor in early stage IgA induction.  
229 By day 14 post-colonization, control mice receiving an isotype-matched irrelevant antibody  
230 generated significantly more fecal IgA than mice receiving anti-CD4 antibody ([Fig. 3b](#)). In  
231 addition to reduced free IgA, *B. ovatus*-bound IgA also decreased in the stool of CD4<sup>+</sup> T cell-  
232 depleted mice ([Fig. 3c](#)). In both small intestine and the colon, the frequency of IgA<sup>+</sup> B cells was  
233 reduced by approximately 1/3 compared to that of IgA<sup>+</sup> B cells being detected in the control  
234 CD4<sup>+</sup> T cell-sufficient mice ([Fig. 3d](#) and [Supplementary Fig. 6d,e](#)). In addition, these control  
235 mice showed more intraluminal IgA than CD4<sup>+</sup> T cell-depleted mice across the whole intestinal  
236 tract ([Fig. 3e](#)).

237

### 238 **Multiplex cocktail of *B. ovatus* strains robustly modify gut IgA production**

239 Given the potential of gut microbiota manipulation as a therapeutic, we next determined whether  
240 the high-IgA phenotype could be transferred to mice harboring microbiotas that induce a low  
241 level of fecal IgA. For this purpose, we recolonized GF C57BL/6 mice with either *B. ovatus*  
242 strain *E* (IgA<sup>high</sup>) or *Q* (IgA<sup>low</sup>) for three weeks, followed by cohousing these mice for an  
243 additional three weeks ([Fig. 4a](#)). After cohousing, mice monocolonized with *B. ovatus* strain *Q*  
244 showed no significant change in fecal IgA. In contrast, mice colonized initially with *B. ovatus*

245 strain *E* had reduced fecal IgA, which raised the possibility that the low-IgA phenotype behaves  
246 as a dominant character in the context of this simple bacterial community (Fig. 4b). Interestingly,  
247 the IgA<sup>low</sup> *B. ovatus* strain Q also dominated the relative abundance of the microbiota, as it  
248 represented ~95% of the microbiota compared with ~5% of *B. ovatus* strain *E* (Fig. 4c). In an  
249 attempt to overcome this resistance to transfer of the high-IgA phenotype to mice with low-IgA  
250 phenotype, we performed a similar experiment but added three more IgA<sup>high</sup> *B. ovatus* strains.  
251 Under these conditions, the high-IgA phenotype was transferred to the cohoused mice initially  
252 monocolonized with the IgA<sup>low</sup> strain (Supplementary Fig. 7a). However, *B. ovatus* strain Q still  
253 represented a substantial proportion (32.5 ~ 53.8%) of the relative abundance in this bacterial  
254 community (Supplementary Fig. 7b). Thus, a multiplex cocktail of bacterial effector strains that  
255 each individually can induce a specific phenotype provides a more robust strategy for  
256 transferring a high-IgA phenotype.

257 Beyond cohousing, we further validated the above findings by transferring IgA<sup>high</sup> strains  
258 therapeutically by oral gavage. Consistent with the cohousing results, mice first colonized with  
259 an IgA<sup>low</sup> *B. ovatus* strain and then orally gavaged with an additional IgA<sup>high</sup> strain did not alter  
260 gut IgA secretion. In contrast, mice receiving a cocktail of four IgA<sup>high</sup> *B. ovatus* strains (*B.*  
261 *ovatus* 4M) produced significantly more fecal IgA (Fig. 4d and Supplementary Table 4).  
262 Metagenomic sequencing results demonstrated that multiple *B. ovatus* strains colonized the  
263 recipient mice (Fig. 4e). Of note, IgA<sup>low</sup> *B. ovatus* strain Q still dominated the relative abundance  
264 of the gut microbiota in individual strain transfers (Fig. 4e). IgA<sup>high</sup> strains accounted for 44% of  
265 the gut microbiota in the *B. ovatus* 4M transfer with each individual IgA<sup>high</sup> strain having a  
266 distinct relative abundance (Fig. 4e). Finally, we replicated these results in mice pre-colonized  
267 with another IgA<sup>low</sup> *B. ovatus* strain *R* (Supplementary Fig. 7c,d).

268 To validate these results in the setting of more complex gut microbiotas, we performed  
269 similar experiments using either gnotobiotic mice colonized by a synthetic cocktail of diverse  
270 bacterial species that included *B. ovatus* IgA<sup>low</sup> strain Q (Supplementary Table 5) or gnotobiotic

271 mice colonized with arrayed culture collections established from donors harboring a functionally  
272 validated IgA<sup>low</sup> *B. ovatus* strain (Fig. 1h and Supplementary Table 6). As with simpler  
273 communities, transfer of the high-IgA phenotype was robustly achieved with *B. ovatus* 4M or a  
274 multiplex cocktail of eight IgA<sup>high</sup> *B. ovatus* strains (*B. ovatus* 8M) (Supplementary Table 4) but  
275 not by individual IgA<sup>high</sup> *B. ovatus* strains (Fig. 4f and Supplementary Fig. 7e). Consistent with  
276 our previous findings, IgA was elevated only in the large intestine (Fig. 4g and Supplementary  
277 Fig. 7f). The relative proportions of each IgA<sup>high</sup> strain and total relative abundance of all IgA<sup>high</sup>  
278 strains in the stool of multiplex bacterial cocktail recipient mice varied across recipient  
279 microbiota communities (Fig. 4h,i and Supplementary Fig. 7g,h).

280 To further validate the IgA-inducing properties of our multiplex IgA<sup>high</sup> *B. ovatus* cocktails,  
281 we tested these cocktails in two additional gnotobiotic mouse models colonized by human  
282 microbiota arrayed culture collections with low-IgA potential (Supplementary Table 6). Again, we  
283 found that the multiplex IgA<sup>high</sup> *B. ovatus* cocktails robustly increased fecal IgA (Supplementary  
284 Fig. 8a-f). Across all of the tested *B. ovatus* 4M and *B. ovatus* 8M recipients, we did not find a  
285 correlation between the total relative abundance of IgA<sup>high</sup> strains and the fecal IgA levels, which  
286 indicates that maximizing the total abundance of IgA<sup>high</sup> *B. ovatus* strains does not necessarily  
287 increase gut IgA production (Supplementary Fig 8g-i). In summary, our results demonstrate that  
288 transfer of multiplex IgA<sup>high</sup> *B. ovatus* strain cocktails, but not that of individual IgA<sup>high</sup> strains,  
289 consistently and robustly modulates the immune system (e.g. IgA phenotype) across several  
290 complex pre-existing gut microbiota.

291

## 292 Discussion

293 Functional differences of pathogenic bacteria at the strain level have been intensively studied in  
294 the past decades and are a fundamental component of infectious disease clinical practice. More  
295 recently the functional impact of bacterial strain variation is becoming apparent in the context of  
296 the protective or disease-enhancing properties of the commensal microbiota<sup>11,12,32,55,56</sup>. Here, we  
297 identified that approximately half of the isolated strains from *B. ovatus* species, which is one of  
298 the most common species of our gut commensal microbiota, drive increased IgA production in  
299 the distal intestinal tract. Interestingly, we did not find that the variation in fecal IgA induced by  
300 different *B. ovatus* strains was related to unique genetic lineages amongst strains or the density  
301 of the bacteria in the feces. Through manipulation of the pre-existing gut microbiota  
302 composition, we discovered that cocktails of IgA<sup>high</sup> *B. ovatus* strains were more efficient than  
303 individual IgA<sup>high</sup> *B. ovatus* strains in converting mice with low gut IgA production into mice  
304 producing large amounts of gut IgA.

305 IgA<sup>high</sup> *B. ovatus* strains increased IgA production in distal but not proximal intestinal  
306 segments by enhancing the ratio of IgA-secreting B cells. Remarkably, this induction was not  
307 dominated by the migration of IgA<sup>+</sup> B cells from canonical IgA inductive sites, as gnotobiotic  
308 mice colonized with either IgA<sup>high</sup> or IgA<sup>low</sup> *B. ovatus* strains showed comparable IgA<sup>+</sup> B cells in  
309 PPs and MLNs. One possibility is that IgA<sup>high</sup> *B. ovatus* strains locally elicit IgA production in the  
310 large intestine including cecal patches, ILFs and LP<sup>2,54,57</sup>. Interestingly, mice harboring specific  
311 *B. ovatus* strains showed no significant differences in the intestinal abundance of *B. ovatus*,  
312 which further highlights the unique IgA-inducing properties of individual strains.

313 After IgA<sup>high</sup> *B. ovatus* strain colonization, CD4<sup>+</sup> T cell-depleted mice showed a reduced  
314 ratio of IgA<sup>+</sup> B cells in the gut, in turn leading to decreased luminal IgA along the entire intestinal  
315 tract. Of note, both CD4<sup>+</sup> T cell-sufficient and T cell-depleted mice produced comparable level of  
316 gut IgA at the beginning post colonization, which suggests CD4<sup>+</sup> T cells play less of a role  
317 during the very early stage of IgA induction likely due to the dominance of the TI B cell-

318 activation pathway. Interestingly, a protein from the gut commensal *Lactobacillus rhamnosus*  
319 was recently shown to locally elicit IgA production via gut epithelial cells<sup>58</sup>. Thus, further studies  
320 will be needed to delineate the precise mechanisms whereby IgA<sup>high</sup> *B. ovatus* strain colonized  
321 mice generate gut IgA. Nevertheless, our study highlights the important contribution of T cells in  
322 bacteria-mediated IgA production, especially in the large intestine<sup>59,60</sup>.

323 FMT-based manipulation of the gut microbiota has a high success rate in the treatment of  
324 recurrent *C. difficile* infection<sup>61</sup>. However, its success in other indications, such as ulcerative  
325 colitis, is more limited<sup>62,63</sup>. Although improving bacteria engraftment remains a key therapeutic  
326 goal of microbiota manipulation<sup>62-64</sup>, identifying new strategies that optimize the transfer of a  
327 specific immune phenotype constitutes a therapeutic goal with a potentially larger range of  
328 applications. Using IgA induction as an example of immunomodulatory phenotype transfer, our  
329 data showed that multiplex bacterial cocktails of IgA<sup>high</sup> *B. ovatus* strains elicited a more robust  
330 phenotype transfer than any individual strain, even in mice with complex gut ecosystem. This  
331 multiplex effector strain cocktail strategy was robust across multiple recipients, who had low-IgA  
332 phenotype and pre-colonized with different microbiotas, and could represent an effective  
333 approach to therapeutically modify gut immune parameters in addition to IgA. Of note, across  
334 the tested inductions of IgA via gut microbiota manipulation with IgA<sup>high</sup> *B. ovatus* strains, we  
335 found that no single strain consistently dominated over the others. Thus, multiplex bacterial  
336 cocktails do not appear to have “super strains” with dominant IgA-inducing function. Rather, the  
337 combination of multiple IgA<sup>high</sup> effector strains in these cocktails has an IgA-inducing potential  
338 superior to that of any individual strain. Intriguingly, the relative abundance of total *B. ovatus*  
339 species remained largely stable even after the introduction of one to eight new strains  
340 suggesting that these new strains largely share the same ecological niches as that occupied by  
341 the pre-existing *B. ovatus*.

342 In summary, our results highlight the importance of bacterial strain variation on the IgA-  
343 inducing potential of the gut microbiota. In addition, we also identify a new strategy (e.g.

344 multiplex bacterial strain cocktail) for the exploitation of strain variation in the development of  
345 robust microbiota-based immunomodulation therapeutic strategies.

346

## 347 **Methods**

### 348 **Mice**

349 Germ-free C57BL/6 and Swiss Webster mice were bred and maintained in flexible film  
350 gnotobiotic isolators (Class Biologically Clean, Ltd.). All mice were group housed with a 12-hour  
351 light/dark cycle and allowed *ad libitum* access to diet and water. All animal studies were carried  
352 out in accordance with protocols approved by the Institutional Animal Care and Use Committee  
353 (IACUC) in Icahn School of Medicine at Mount Sinai.

354

### 355 **Colonization of germ-free mice with cultured bacteria**

356 Germ-free mice (~8 weeks old) were colonized 200- $\mu$ l aliquot of bacteria suspension via oral  
357 gavage. Colonized mice were housed in flexible film vinyl isolators or in filter top cages using  
358 previously described techniques<sup>43</sup>.

359

### 360 **Growth and isolation of bacterial strains**

361 All bacterial strains were obtained from previously banked stool, public culture repositories or  
362 human gut microbiota arrayed culture collections<sup>27</sup>. All bacterial strains isolated for this study  
363 were isolated from deidentified stool samples from individuals under a Mount Sinai IRB  
364 approved protocol (IRB-16-00008). All bacteria apart from *E. coli* were grown under anaerobic  
365 condition at 37°C in Brain Heart Infusion (BHI) medium supplemented with 0.5% yeast extract  
366 (Difco Laboratories), 0.4% monosaccharide mixture, 0.3% disaccharide mixture, L-cysteine (0.5  
367 mg/ml; Sigma-Aldrich), malic acid (1 mg/ml; Sigma-Aldrich) and 5  $\mu$ g/ml hemin. *E. coli* was  
368 cultured in LB Broth Miller (EMD Chemicals, Inc.) under aerobic condition at 37°C.

369

### 370 **Quantification of immunoglobulins by ELISA**

371 Total fecal and serum IgA were measured by sandwich ELISA. For total IgA detection, ELISA  
372 plates (Corning 3690) were coated with 1  $\mu$ g/ml goat anti-mouse IgA (SouthernBiotech, AL)



373 capture antibody overnight at 4°C. Plates were washed and blocked with 1% BSA in PBS for 2 h  
374 at room temperature. Diluted samples and standards were added and incubated overnight at  
375 4°C. Captured IgA was detected by horseradish peroxidase (HRP)-conjugated goat anti-mouse  
376 IgA antibody (Sigma-Aldrich). ELISA plates were developed by TMB microwell peroxidase  
377 substrate (KPL, Inc.) and quenched by 1 M H<sub>2</sub>SO<sub>4</sub>. Colorimetric reaction was measured at OD =  
378 450 nm by a Synergy™ HTX Multi-Mode Microplate Reader (BioTek Instruments, Inc.). Other  
379 serum immunoglobulins (IgG1, IgG2a, IgG2b, IgG3, IgM and IgE) were also detected using  
380 sandwich ELISA with the following capture and detection antibody pairs (all the following  
381 antibodies were purchased from SouthernBiotech, AL): goat anti-mouse IgG1, goat anti-mouse  
382 IgG2a, goat anti-mouse IgG2b, goat anti-mouse IgG3, rat anti-mouse IgE, rat anti-mouse IgM,  
383 goat anti-mouse IgG-HRP, goat anti-mouse IgE-HRP and goat anti-mouse IgM-HRP.  
384 Corresponding mouse immunoglobulin isotypes were used as standards.

385

#### 386 **Depletion of CD4<sup>+</sup> T Cells in germ-free mice**

387 *In vivo* depletion of CD4<sup>+</sup> T cells was performed as described<sup>65</sup>. Briefly, gnotobiotic mice (8  
388 weeks old) were first injected intraperitoneally (i.p.) with anti-mouse CD4 monoclonal antibody  
389 (Bio X Cell, clone GK1.5) or matched isotype control (Bio X Cell, clone LTF-2) at 0.5  
390 mg/day/mouse for 3 consecutive days. Then the injection was performed every 3 days for a  
391 period of 3 weeks. Five days after the first antibody injection, mice were inoculated via oral  
392 gavage with *B. ovatus* strain *E*. Efficacy of T cell depletion was evaluated by flow cytometry.

393

#### 394 **Lymphocyte isolation from tissues**

395 To isolate mononuclear cells from Peyer's patches (PPs), PPs were excised from mouse small  
396 intestines and incubated in dissociation buffer, containing Hank's Balanced Salt Solution  
397 (HBSS) without Ca<sup>2+</sup> and Mg<sup>2+</sup> (GIBCO), 10% fetal bovine serum (FBS), 5 mM EDTA and 15  
398 mM HEPES, at 37°C for 30 min. Later, tissues were mechanically separated by pushing them

399 through a 70 µm strainer into Iscove's Modified Dulbecco's Medium (IMDM) supplemented with  
400 2% FBS. Filtered cells were spun down, washed and resuspended in IMDM/2%FBS. Lamina  
401 propria lymphocytes were isolated as described<sup>27</sup>. Briefly, small intestines and colons were  
402 excised, followed by removing visceral fat and intestinal contents. Tissues were opened  
403 longitudinally, washed twice in HBSS and incubated in dissociation buffer for 30 min at 37°C  
404 with mild agitation to remove epithelium and intraepithelial lymphocytes. Tissues were then  
405 washed three times in ice cold HBSS, cut into ~2 cm pieces and digested with collagenase  
406 (Sigma-Aldrich), DNase I (Sigma-Aldrich) and dispase I (Corning). Cell suspensions were  
407 filtered through 70 µm cell strainers, washed three times, and resuspended in IMDM/2%FBS.  
408 Mesenteric lymph nodes were separated from mesenteric fat and dissociated in IMDM/2%FBS  
409 by physically pressing the tissues between the frosted portions of two glass microscope slides.  
410 The cell suspension was filtered through a 70 µm cell strainer, washed three times and  
411 resuspended in IMDM/2%FBS

412

#### 413 **Detection of IgA-coated bacteria in feces**

414 IgA-coated fecal bacteria were measured by flow cytometry as previously described<sup>12,13</sup>. Briefly,  
415 mouse fecal pellets, stored at -80°C freezer after collection, were dissolved in PBS to a final  
416 concentration of 100 milligram per milliliter PBS by weight, thawed at room temperature,  
417 homogenized in vortex mixer and centrifuged at 4°C to remove large particles. The supernatant  
418 was passed through a 40 µm sterile nylon filter and 50 µl aliquot of the bacteria suspension was  
419 collected for staining. Bacteria were pelleted by centrifugation and washed in 1ml of  
420 PBS/1%BSA/2mM EDTA for 3 times. Non-specific binding sites were first blocked with 50 µl  
421 PBS/1%BSA/20% rat serum for 20 min at 4°C. Bacteria were then stained with 50 µl  
422 of PBS/1%BSA/2mM EDTA buffer containing 1:100 dilution of monoclonal rat anti-mouse IgA  
423 antibody (eBioscience, clone mA-6E1) for 30 min at 4°C. After washing 3 times, bacterial pellets  
424 were resuspended in PBS containing SYBR Green I (1:100,000 dilution; Invitrogen). Samples

425 were run through a BD LSR Fortessa™ cell analyzer and further analyzed by FlowJo software  
426 (Tree Star, Inc.). Only SYBR positive events were regarded as bacteria and gated for further  
427 quantification of IgA-coated bacteria ([Supplementary Fig. 9](#)).

428

#### 429 **Flow cytometry analysis and antibodies**

430 Isolated mononuclear cells were washed in PBS and incubated with Zombie Aqua™ dye  
431 (BioLegend) to distinguish live and dead cells. Before surface staining, non-specific binding of  
432 immunoglobulin to Fc receptors was blocked by anti-mouse CD16/32 antibody (BD  
433 Biosciences). Cells were stained in FACS buffer (PBS without Ca<sup>2+</sup>/Mg<sup>2+</sup> supplemented with 2%  
434 FBS and 2 mM EDTA) containing a mix of antibodies for 30 min at 4°C. The following antibodies  
435 were purchased from BioLegend if not indicated otherwise: anti-mouse CD45 (clone 30-F11),  
436 anti-mouse/human CD45R/B220 (clone RA3-6B2), anti-mouse GL7 (clone GL7), anti-mouse  
437 CD4 (clone GK1.5), anti-mouse IgA (eBioscience, clone mA-6E1). For the staining of IgA<sup>+</sup> cells,  
438 both surface and intracellular staining were performed. Multi-parameter analysis was conducted  
439 with BD™ LSR II flow cytometry and analyzed with FlowJo software (Tree Star, Inc.). Only live  
440 cells and singlets were used in all analyses ([Supplementary Fig. 9](#)).

441

#### 442 **Extraction of bacterial DNA from feces**

443 Each murine fecal pellet was collected into a 2 ml screw cap tube (Axygen Scientific,  
444 SCT200SSC) and stored at -80°C freezer until processing. Each sample was mixed with 1.3 ml  
445 of buffer, composed of 282 µl of DNA buffer A (20 mM Tris pH 8.0, 2 mM EDTA and 200 mM  
446 NaCl), 200 µl of 20% SDS (v/w), 550 µl of Phenol:Chloroform:IAA (25:24:1) (Ambion, AM9732)  
447 and 268 µl of Buffer PM (Qiagen, 19083), and 400 µl of 0.1 mm diameter zirconia/silica beads  
448 (BioSpec, 11079101z). Next, the sample was mechanically lysed with a Mini-Beadbeater-96  
449 (BioSpec, 1001) for 5 min at room temperature. After centrifuging for 5 min at 4000 rpm  
450 (Eppendorf Centrifuge 5810 R), all aqueous phase was collected, mixed with 650 µl of Buffer

451 PM thoroughly before running through a Qiagen spin column. The column was washed twice  
452 with Buffer PE (Qiagen, 19065). Attached DNA was eluted with 100 µl of Buffer EB (Qiagen,  
453 19086) and quantified with Qubit™ dsDNA Assay Kit (Thermo Fisher Scientific,  
454 Q32853/Q32854). Bacteria density was calculated by the following equation: Bacteria Density =  
455 DNA yield per sample (ug) / weight of sample (mg)<sup>66</sup>.

456

#### 457 **Bacterial genome and metagenomic sequencing**

458 Purified bacterial template DNA (~250 ng) was sonicated and prepared using the NEBNext®  
459 Ultra™ II DNA Library Prep kit. Samples were pooled and sequenced with an Illumina HiSeq  
460 4000 with pair-end 150nt reads. Metagenomic sequencing reads were mapped back to the  
461 reference genomes for each experiment to determine the relative abundance of each strain. To  
462 uniquely distinguish each strain, 100K sequencing reads for each sample were mapped to the  
463 unique regions of each genome and final abundances were scaled by the unique genome size  
464 of each strain (i.e. genome equivalents), as previously described<sup>67</sup>.

465

#### 466 **Immunofluorescence staining**

467 Immunofluorescence staining was performed as described previously<sup>25,60</sup>. Briefly, intestinal  
468 tissues were fixed in 10% neutral formalin overnight at 4°C, dehydrated in 15% and 30%  
469 sucrose buffer sequentially and mounted in O.C.T Embedding Compound (Electron Microscopy  
470 Sciences). Cryostat sections (~8 µm) were prepared, blocked with anti-CD16/32 antibody in  
471 10% (v/v) rat serum/0.1% Triton-X100 in PBS for 30 min at room temperature and incubated  
472 with the indicated primary antibodies at 4°C overnight. The following primary antibodies were  
473 used: rat anti-mouse IgA-FITC (1/300 dilution; eBioscience, clone mA-6E1), goat anti-mouse  
474 pIgR (1/500 dilution; R&D Systems, cat #: AF2800). Slides were washed in PBS for three times,  
475 incubated with Alexa Fluor®-conjugated species-specific secondary antibody (1/400 dilution;  
476 Invitrogen) for 1 h at room temperature if needed and finally mounted with ProLong® Gold Anti-

477 fade Reagent with DAPI (Invitrogen). Fluorescence images of sections were acquired with a  
478 LSM780 confocal laser-scanning microscope (Carl Zeiss) and further processed in ImageJ if  
479 necessary.

480

#### 481 **Statistical analysis**

482 Data are shown as mean  $\pm$  SEM. Statistical significance between two groups was assessed by  
483 an unpaired, two-tailed Student's *t* test. Comparisons among three or more groups were  
484 performed using One-way ANOVA. Bimodality distribution of IgA levels induced by different *B.*  
485 *ovatus* strains was performed in R (R package 'diptest'). For correlation test, Pearson  
486 correlation coefficient was employed. Data plotting, interpolation and statistical analysis were  
487 performed using GraphPad Prism 6.0 (GraphPad Software, La Jolla, CA) or R statistical  
488 software (version 3.2.2). A *p*-value less than 0.05 is considered statistically significant.

489

490 **Data availability**

491 Bacterial genomes and metagenomic sequencing reads for this study are available via NCBI  
492 BioProject accession number PRJNA518912.

493

494 **Acknowledgments**

495 We are grateful to C. Fermin, E. Vazquez, and G. Escano for the husbandry of gnotobiotic mice;  
496 Drs. Anuk Das, Dirk Gevers, C. Cunningham-Rundles, B. Brown and T. Moran for helpful  
497 discussions and comments. This work was supported in part by the staff and resources of the  
498 Gnotobiotic Mouse Core Facility, the Microbiome Translational Center, the Flow Cytometry Core  
499 Facility and the Scientific Computing Division in Icahn School of Medicine at Mount Sinai. This  
500 work was supported by National Institutes of Health Grants (NIGMS GM108505 and NCCIH  
501 AT008661) and Janssen Human Microbiome Institute (to J.J.F.) and NIH DK112679 (to E.J.C.).

502

503 **Author contributions**

504 C.Y. and J.J.F. conceived the study and designed the experiments; C.Y., I.M., E.J.C., J.B., V.A.,  
505 E.G., D.H., M.D. and J.J.F. collected samples and conducted the experiments; I.M. and Z.L.  
506 provided bacterial isolates; C.Y., S.M., A.C. and J.J.F. analyzed data; C.Y. and J.J.F. prepared  
507 the manuscript. All authors read and approved the final manuscript.

508

509 **Competing interests**

510 J.J.F. serves as a consultant for Janssen Research & Development LLC. The other authors  
511 declare no conflict of interests.

512

## 513 References

- 514 1 Sutherland, D. B., Suzuki, K. & Fagarasan, S. Fostering of advanced mutualism with gut  
515 microbiota by Immunoglobulin A. *Immunological Reviews* **270**, 20-31,  
516 doi:10.1111/imr.12384 (2016).
- 517 2 Cerutti, A. & Rescigno, M. The biology of intestinal immunoglobulin A responses.  
518 *Immunity* **28**, 740-750, doi:10.1016/j.immuni.2008.05.001 (2008).
- 519 3 Macpherson, A. J., Geuking, M. B. & McCoy, K. D. Homeland Security: IgA immunity at  
520 the frontiers of the body. *Trends Immunol* **33**, 160-167, doi:10.1016/j.it.2012.02.002  
521 (2012).
- 522 4 Okai, S. *et al.* High-affinity monoclonal IgA regulates gut microbiota and prevents colitis  
523 in mice. *Nat Microbiol* **1**, 16103, doi:10.1038/nmicrobiol.2016.103 (2016).
- 524 5 Tokuhara, D. *et al.* Secretory IgA-mediated protection against *V. cholerae* and heat-  
525 labile enterotoxin-producing enterotoxigenic *Escherichia coli* by rice-based vaccine. *Proc*  
526 *Natl Acad Sci U S A* **107**, 8794-8799, doi:10.1073/pnas.0914121107 (2010).
- 527 6 Strugnell, R. A. & Wijburg, O. L. C. The role of secretory antibodies in infection immunity.  
528 *Nat Rev Microbiol* **8**, 656-667, doi:10.1038/nrmicro2384 (2010).
- 529 7 Fagarasan, S. Evolution, development, mechanism and function of IgA in the gut. *Curr*  
530 *Opin Immunol* **20**, 170-177, doi:10.1016/j.coi.2008.04.002 (2008).
- 531 8 Pabst, O. New concepts in the generation and functions of IgA. *Nature Reviews*  
532 *Immunology* **12**, 821-832, doi:10.1038/nri3322 (2012).
- 533 9 McLoughlin, K., Schluter, J., Rakoff-Nahoum, S., Smith, A. L. & Foster, K. R. Host  
534 Selection of Microbiota via Differential Adhesion. *Cell Host Microbe* **19**, 550-559,  
535 doi:10.1016/j.chom.2016.02.021 (2016).
- 536 10 Donaldson, G. P. *et al.* Gut microbiota utilize immunoglobulin A for mucosal colonization.  
537 *Science* **360**, 795-800, doi:10.1126/science.aaq0926 (2018).
- 538 11 Viladomiu, M. *et al.* IgA-coated *E. coli* enriched in Crohn's disease spondyloarthritis  
539 promote TH17-dependent inflammation. *Sci Transl Med* **9**,  
540 doi:10.1126/scitranslmed.aaf9655 (2017).
- 541 12 Palm, N. W. *et al.* Immunoglobulin A coating identifies colitogenic bacteria in  
542 inflammatory bowel disease. *Cell* **158**, 1000-1010, doi:10.1016/j.cell.2014.08.006 (2014).
- 543 13 Kau, A. L. *et al.* Functional characterization of IgA-targeted bacterial taxa from  
544 undernourished Malawian children that produce diet-dependent enteropathy. *Sci Transl*  
545 *Med* **7**, 276ra224, doi:10.1126/scitranslmed.aaa4877 (2015).
- 546 14 Macpherson, A. J. *et al.* A primitive T cell-independent mechanism of intestinal mucosal  
547 IgA responses to commensal bacteria. *Science* **288**, 2222+, doi:DOI  
548 10.1126/science.288.5474.2222 (2000).
- 549 15 Hapfelmeier, S. *et al.* Reversible microbial colonization of germ-free mice reveals the  
550 dynamics of IgA immune responses. *Science* **328**, 1705-1709,  
551 doi:10.1126/science.1188454 (2010).
- 552 16 Peterson, D. A., McNulty, N. P., Guruge, J. L. & Gordon, J. I. IgA response to symbiotic  
553 bacteria as a mediator of gut homeostasis. *Cell Host Microbe* **2**, 328-339,  
554 doi:10.1016/j.chom.2007.09.013 (2007).
- 555 17 Fritz, J. H. *et al.* Acquisition of a multifunctional IgA+ plasma cell phenotype in the gut.  
556 *Nature* **481**, 199-203, doi:10.1038/nature10698 (2011).
- 557 18 Macpherson, A. J., McCoy, K. D., Johansen, F. E. & Brandtzaeg, P. The immune  
558 geography of IgA induction and function. *Mucosal Immunol* **1**, 11-22,  
559 doi:10.1038/mi.2007.6 (2008).
- 560 19 Bunker, J. J. *et al.* Innate and Adaptive Humoral Responses Coat Distinct Commensal  
561 Bacteria with Immunoglobulin A. *Immunity* **43**, 541-553,  
562 doi:10.1016/j.immuni.2015.08.007 (2015).

- 563 20 Lindner, C. *et al.* Diversification of memory B cells drives the continuous adaptation of  
564 secretory antibodies to gut microbiota. *Nat Immunol* **16**, 880-888, doi:10.1038/ni.3213  
565 (2015).
- 566 21 Obata, T. *et al.* Indigenous opportunistic bacteria inhabit mammalian gut-associated  
567 lymphoid tissues and share a mucosal antibody-mediated symbiosis. *P Natl Acad Sci*  
568 *USA* **107**, 7419-7424, doi:10.1073/pnas.1001061107 (2010).
- 569 22 Lecuyer, E. *et al.* Segmented filamentous bacterium uses secondary and tertiary  
570 lymphoid tissues to induce gut IgA and specific T helper 17 cell responses. *Immunity* **40**,  
571 608-620, doi:10.1016/j.immuni.2014.03.009 (2014).
- 572 23 Chudnovskiy, A. *et al.* Host-Protozoan Interactions Protect from Mucosal Infections  
573 through Activation of the Inflammasome. *Cell* **167**, 444-456 e414,  
574 doi:10.1016/j.cell.2016.08.076 (2016).
- 575 24 Shibata, N. *et al.* Lymphoid tissue-resident *Alcaligenes* LPS induces IgA production  
576 without excessive inflammatory responses via weak TLR4 agonist activity. *Mucosal*  
577 *Immunol*, doi:10.1038/mi.2017.103 (2018).
- 578 25 Moon, C. *et al.* Vertically transmitted faecal IgA levels determine extra-chromosomal  
579 phenotypic variation. *Nature* **521**, 90-93, doi:10.1038/nature14139 (2015).
- 580 26 Macpherson, A. J., Koller, Y. & McCoy, K. D. The bilateral responsiveness between  
581 intestinal microbes and IgA. *Trends Immunol* **36**, 460-470, doi:10.1016/j.it.2015.06.006  
582 (2015).
- 583 27 Faith, J. J., Ahern, P. P., Ridaura, V. K., Cheng, J. & Gordon, J. I. Identifying gut  
584 microbe-host phenotype relationships using combinatorial communities in gnotobiotic  
585 mice. *Sci Transl Med* **6**, 220ra211, doi:10.1126/scitranslmed.3008051 (2014).
- 586 28 Atarashi, K. *et al.* Induction of colonic regulatory T cells by indigenous *Clostridium*  
587 species. *Science* **331**, 337-341, doi:10.1126/science.1198469 (2011).
- 588 29 Round, J. L. & Mazmanian, S. K. Inducible Foxp3<sup>+</sup> regulatory T-cell development by a  
589 commensal bacterium of the intestinal microbiota. *Proc Natl Acad Sci U S A* **107**, 12204-  
590 12209, doi:10.1073/pnas.0909122107 (2010).
- 591 30 Ivanov, I. I. *et al.* Induction of intestinal Th17 cells by segmented filamentous bacteria. *Cell*  
592 **139**, 485-498, doi:10.1016/j.cell.2009.09.033 (2009).
- 593 31 Mortha, A. *et al.* Microbiota-dependent crosstalk between macrophages and ILC3  
594 promotes intestinal homeostasis. *Science* **343**, 1249288, doi:10.1126/science.1249288  
595 (2014).
- 596 32 Britton, G. J. *et al.* Microbiotas from Humans with Inflammatory Bowel Disease Alter the  
597 Balance of Gut Th17 and ROR $\gamma$ mat(+) Regulatory T Cells and Exacerbate Colitis in  
598 Mice. *Immunity* **50**, 212-224 e214, doi:10.1016/j.immuni.2018.12.015 (2019).
- 599 33 Clemente, J. C., Manasson, J. & Scher, J. U. The role of the gut microbiome in systemic  
600 inflammatory disease. *BMJ* **360**, j5145, doi:10.1136/bmj.j5145 (2018).
- 601 34 Smillie, C. S. *et al.* Strain Tracking Reveals the Determinants of Bacterial Engraftment in  
602 the Human Gut Following Fecal Microbiota Transplantation. *Cell Host Microbe* **23**, 229-  
603 240 e225, doi:10.1016/j.chom.2018.01.003 (2018).
- 604 35 Seekatz, A. M. *et al.* Recovery of the gut microbiome following fecal microbiota  
605 transplantation. *MBio* **5**, e00893-00814, doi:10.1128/mBio.00893-14 (2014).
- 606 36 Shankar, V. *et al.* Species and genus level resolution analysis of gut microbiota in  
607 *Clostridium difficile* patients following fecal microbiota transplantation. *Microbiome* **2**, 13,  
608 doi:10.1186/2049-2618-2-13 (2014).
- 609 37 Clemente, J. C. & Dominguez-Bello, M. G. Safety of vaginal microbial transfer in infants  
610 delivered by caesarean, and expected health outcomes. *BMJ* **352**, i1707,  
611 doi:10.1136/bmj.i1707 (2016).



- 612 38 Petrof, E. O. & Khoruts, A. From stool transplants to next-generation microbiota  
613 therapeutics. *Gastroenterology* **146**, 1573-1582, doi:10.1053/j.gastro.2014.01.004  
614 (2014).
- 615 39 Human Microbiome Project, C. Structure, function and diversity of the healthy human  
616 microbiome. *Nature* **486**, 207-214, doi:10.1038/nature11234 (2012).
- 617 40 Turnbaugh, P. J. *et al.* A core gut microbiome in obese and lean twins. *Nature* **457**, 480-  
618 484, doi:10.1038/nature07540 (2009).
- 619 41 Kanasugi, H. *et al.* Single administration of enterococcal preparation (FK-23) augments  
620 non-specific immune responses in healthy dogs. *Int J Immunopharmacol* **19**, 655-659  
621 (1997).
- 622 42 Reber, S. O. *et al.* Immunization with a heat-killed preparation of the environmental  
623 bacterium *Mycobacterium vaccae* promotes stress resilience in mice. *Proc Natl Acad Sci*  
624 *U S A* **113**, E3130-3139, doi:10.1073/pnas.1600324113 (2016).
- 625 43 Faith, J. J. *et al.* The long-term stability of the human gut microbiota. *Science* **341**,  
626 1237439, doi:10.1126/science.1237439 (2013).
- 627 44 Faith, J. J., Colombel, J.-F. & Gordon, J. I. Identifying strains that contribute to complex  
628 diseases through the study of microbial inheritance. *Proceedings of the National*  
629 *Academy of Sciences* **112**, 633-640, doi:10.1073/pnas.1418781112 (2015).
- 630 45 Shijie Zhao, T. D. L., Mathilde poyet, Sean M. Gibbons, Mathieu Groussin, Ramnik J.  
631 Xavier, Eric J. Alm. Adaptive evolution within the gut microbiome of individual people.  
632 *BioRxiv*, doi:<https://doi.org/10.1101/208009> (2018).
- 633 46 Vatanen, T. *et al.* Genomic variation and strain-specific functional adaptation in the  
634 human gut microbiome during early life. *Nat Microbiol*, doi:10.1038/s41564-018-0321-5  
635 (2018).
- 636 47 Kim, M., Qie, Y., Park, J. & Kim, C. H. Gut Microbial Metabolites Fuel Host Antibody  
637 Responses. *Cell Host Microbe* **20**, 202-214, doi:10.1016/j.chom.2016.07.001 (2016).
- 638 48 Fransen, F. *et al.* BALB/c and C57BL/6 Mice Differ in Polyreactive IgA Abundance,  
639 which Impacts the Generation of Antigen-Specific IgA and Microbiota Diversity. *Immunity*  
640 **43**, 527-540, doi:10.1016/j.immuni.2015.08.011 (2015).
- 641 49 Johansen, F. E. & Kaetzel, C. S. Regulation of the polymeric immunoglobulin receptor  
642 and IgA transport: new advances in environmental factors that stimulate pIgR expression  
643 and its role in mucosal immunity. *Mucosal Immunol* **4**, 598-602, doi:10.1038/mi.2011.37  
644 (2011).
- 645 50 Hooper, L. V. *et al.* Molecular analysis of commensal host-microbial relationships in the  
646 intestine. *Science* **291**, 881-884, doi:10.1126/science.291.5505.881 (2001).
- 647 51 Schneeman, T. A. *et al.* Regulation of the Polymeric Ig Receptor by Signaling through  
648 TLRs 3 and 4: Linking Innate and Adaptive Immune Responses. *The Journal of*  
649 *Immunology* **175**, 376-384, doi:10.4049/jimmunol.175.1.376 (2005).
- 650 52 Chorny, A., Puga, I. & Cerutti, A. Innate Signaling Networks in Mucosal IgA Class  
651 Switching. *Adv Immunol* **107**, 31-69, doi:10.1016/S0065-2776(10)07006-9 (2010).
- 652 53 Suzuki, K., Kawamoto, S., Maruya, M. & Fagarasan, S. GALT: Organization and  
653 Dynamics Leading to IgA Synthesis. *Adv Immunol* **107**, 153-185, doi:10.1016/S0065-  
654 277600)07003-3 (2010).
- 655 54 Fagarasan, S., Kawamoto, S., Kanagawa, O. & Suzuki, K. Adaptive immune regulation  
656 in the gut: T cell-dependent and T cell-independent IgA synthesis. *Annu Rev Immunol*  
657 **28**, 243-273, doi:10.1146/annurev-immunol-030409-101314 (2010).
- 658 55 Palmela, C. *et al.* Adherent-invasive *Escherichia coli* in inflammatory bowel disease. *Gut*  
659 **67**, 574-587, doi:10.1136/gutjnl-2017-314903 (2018).
- 660 56 Arthur, J. C. *et al.* Intestinal inflammation targets cancer-inducing activity of the  
661 microbiota. *Science* **338**, 120-123, doi:10.1126/science.1224820 (2012).

- 662 57 Masahata, K. *et al.* Generation of colonic IgA-secreting cells in the caecal patch. *Nat*  
663 *Commun* **5**, 3704, doi:10.1038/ncomms4704 (2014).
- 664 58 Wang, Y. *et al.* An LGG-derived protein promotes IgA production through upregulation of  
665 APRIL expression in intestinal epithelial cells. *Mucosal Immunol* **10**, 373-384,  
666 doi:10.1038/mi.2016.57 (2017).
- 667 59 Kawamoto, S. *et al.* Foxp3(+) T cells regulate immunoglobulin a selection and facilitate  
668 diversification of bacterial species responsible for immune homeostasis. *Immunity* **41**,  
669 152-165, doi:10.1016/j.immuni.2014.05.016 (2014).
- 670 60 Kunisawa, J. *et al.* Microbe-dependent CD11b+ IgA+ plasma cells mediate robust early-  
671 phase intestinal IgA responses in mice. *Nat Commun* **4**, 1772, doi:10.1038/ncomms2718  
672 (2013).
- 673 61 van Nood, E. *et al.* Duodenal infusion of donor feces for recurrent *Clostridium difficile*. *N*  
674 *Engl J Med* **368**, 407-415, doi:10.1056/NEJMoa1205037 (2013).
- 675 62 Moayyedi, P. *et al.* Fecal Microbiota Transplantation Induces Remission in Patients With  
676 Active Ulcerative Colitis in a Randomized Controlled Trial. *Gastroenterology* **149**, 102-+,  
677 doi:10.1053/j.gastro.2015.04.001 (2015).
- 678 63 Rossen, N. G. *et al.* Findings From a Randomized Controlled Trial of Fecal  
679 Transplantation for Patients With Ulcerative Colitis. *Gastroenterology* **149**, 110-118  
680 e114, doi:10.1053/j.gastro.2015.03.045 (2015).
- 681 64 Grinspan, A. M. & Kelly, C. R. Fecal Microbiota Transplantation for Ulcerative Colitis: Not  
682 Just Yet. *Gastroenterology* **149**, 15-18, doi:10.1053/j.gastro.2015.05.030 (2015).
- 683 65 Kruisbeek, A. M. In vivo depletion of CD4- and CD8-specific T cells. *Curr Protoc*  
684 *Immunol* **Chapter 4**, Unit 4 1, doi:10.1002/0471142735.im0401s01 (2001).
- 685 66 Contijoch, E. J. *et al.* Gut microbiota density influences host physiology and is shaped by  
686 host and microbial factors. *Elife* **8**, doi:10.7554/eLife.40553 (2019).
- 687 67 McNulty, N. P., Wu, M., Erickson, A. R., Pan, C. & Erickson, B. K. Effects of Diet on  
688 Resource Utilization by a Model Human Gut Microbiota Containing *Bacteroides*  
689 *cellulosilyticus* WH2, a Symbiont with an Extensive Glycobiome. *PLoS biology* **11**,  
690 e1001637, doi:10.1371/journal.pbio.1001637 (2013).
- 691  
692

693 **Figures**

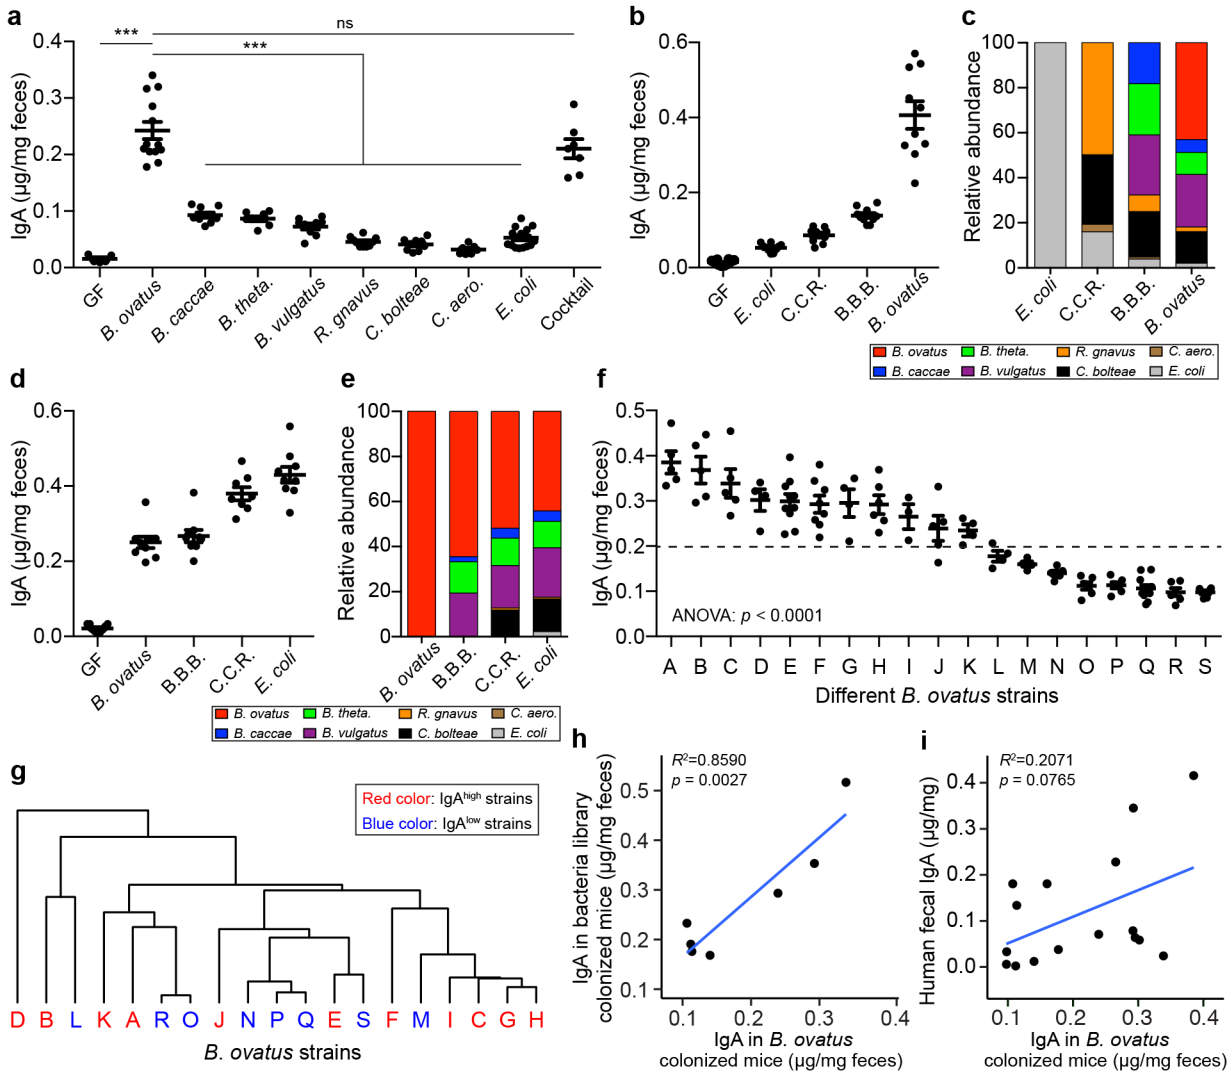

694

695 **Fig. 1 | *B. ovatus* species, with strain-level differences, predominantly induces fecal IgA**

696 **production in gnotobiotic mice. (a)** Fecal IgA level in C57BL/6 gnotobiotic mice colonized

697 with individual or a cocktail of human gut commensal bacteria for three weeks. **(b-e)** The

698 concentration of fecal IgA **(b and d)** and proportion of each bacterial strain **(c and e)** in stool of

699 gnotobiotic mice that were colonized sequentially with individual or combined bacterial

700 communities starting from *E. coli* **(b and c)** or *B. ovatus* **(d and e)**. Feces were harvested before

701 addition of new bacteria to the same mice. C.C.R.: cocktail of *C. bolteae*, *C. aerofaciens* and *R.*

702 *gnavus*; B.B.B.: cocktail of *B. caccae*, *B. theta*. and *B. vulgatus* **(f)** Quantification of fecal IgA in

703 gnotobiotic mice upon colonization with an individual strain of *B. ovatus* for three weeks. Unique  
704 strains of *B. ovatus* were isolated from the stools of different human donors. Dotted line  
705 separates high- and low-IgA phenotypes. (g) Dendrogram clustering of different *B. ovatus*  
706 strains basing on the dissimilarity of bacterial genomic DNA sequences. (h) Correlation of stool  
707 IgA levels between single *B. ovatus* strain monocolonized mice versus mice colonized with a  
708 microbiota arrayed culture collection that included that single *B. ovatus* strain. Both single *B.*  
709 *ovatus* strains and arrayed culture collections were isolated from the same donor. (i) Correlation  
710 of fecal IgA concentration between single *B. ovatus* strain colonized mice versus human donor.  
711 Data shown are mean  $\pm$  standard error of the mean. Each dot in **a**, **b**, **d** and **f** represents a  
712 biological replicate. The average fecal IgA concentration from 4-10 mice was used for  
713 correlation in **h** and **i**. Detailed strain information is listed in [Supplementary Tables 1 and 2](#).  $p$ -  
714 values with statistical significance (assessed by two-tailed Student's *t* test or one-way ANOVA)  
715 are indicated: \*\*\* $p < 0.001$ ; ns, not significant.  
716

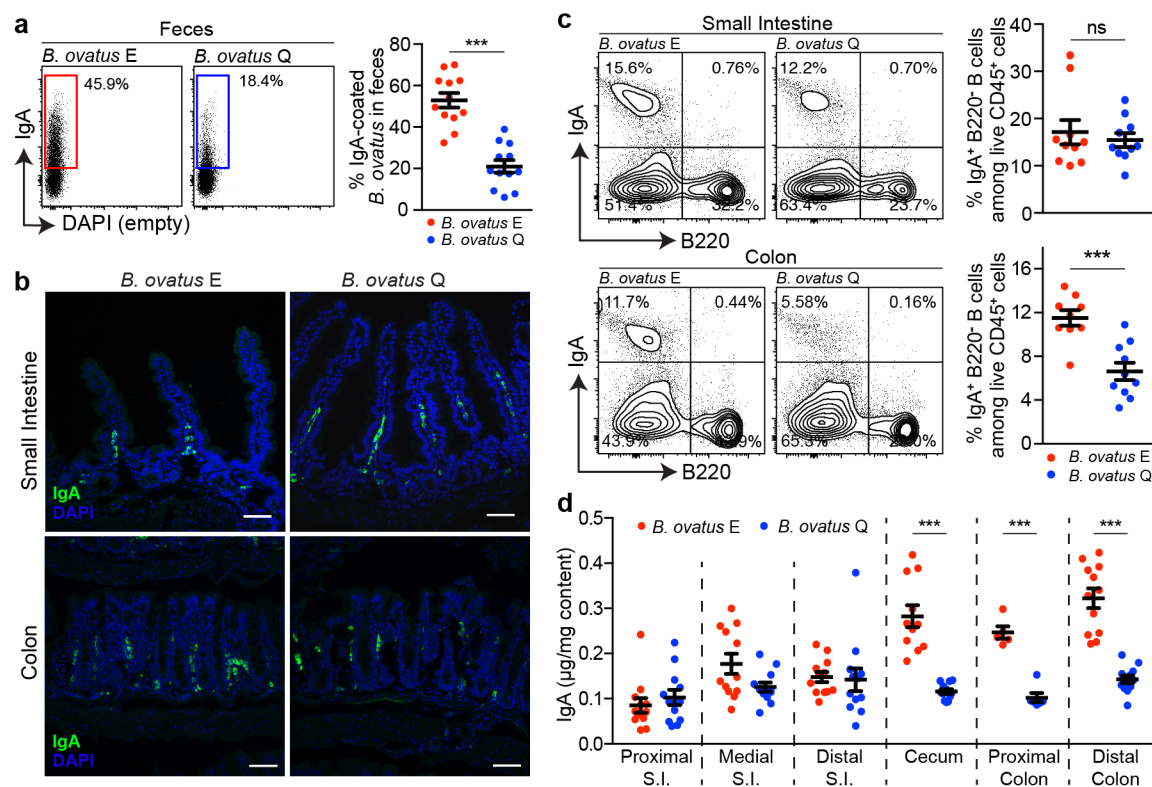

717

718 **Fig. 2 | IgA<sup>high</sup> *B. ovatus* strain elicits stronger IgA responses in the large intestine. (a)**

719 Representative flow cytometry plot and quantification of IgA-coated *B. ovatus* in feces of

720 gnotobiotic mice harboring either *B. ovatus* strain E or Q. (b) Representative images of IgA<sup>+</sup>

721 cells in small intestine and the colon are shown. IgA<sup>+</sup> cells were stained with anti-IgA (green);

722 Nuclei were counter-stained with DAPI (4',6-diamidino-2-phenylindole) (blue). n = 5~6. Scale

723 bar = 50 μm. (c) Percentage of IgA<sup>+</sup> B cells in small intestinal and colonic tissues is shown. LP

724 lymphocytes were analyzed by flow cytometry. Number adjacent to gate represents for this percentage.

725 (d) Free IgA concentration in luminal contents along the length of the intestine. S.I.: small

726 intestine. Data shown are mean ± standard error of the mean. Each dot represents an individual

727 mouse. *p*-values with statistical significance (assessed by two-tailed Student's *t* test) are

728 indicated: \*\*\**p* < 0.001; ns, not significant.

729

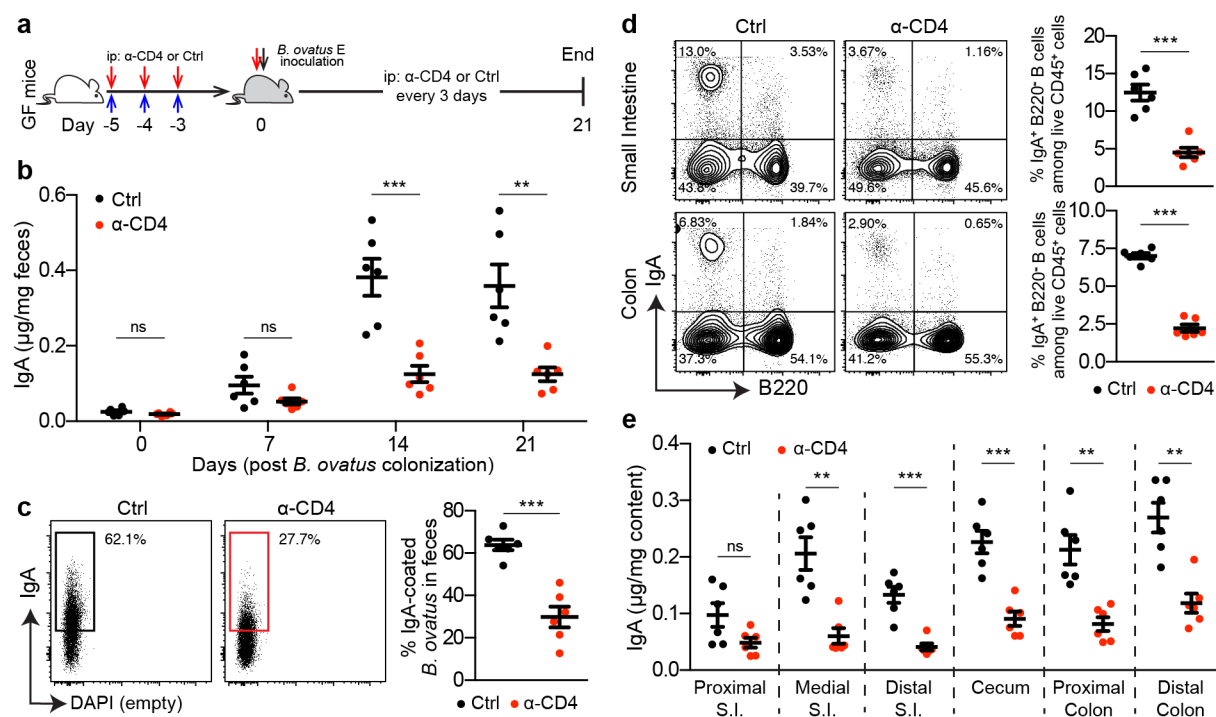

730

731 **Fig. 3 | Both T-cell-dependent and T-cell-independent pathways are involved in fecal IgA**

732 **induction mediated by *B. ovatus* strain E.** (a) Schematic representation of CD4<sup>+</sup> T cells

733 depletion in GF B6 mice is illustrated. Red arrows represent i.p. injection of anti-CD4 antibody or

734 isotype control. Black arrow indicates *B. ovatus* strain E inoculation and blue arrows represent

735 time. (b) Dynamics of fecal IgA concentration in *B. ovatus* strain E inoculated gnotobiotic B6

736 mice treated with either anti-CD4 antibody or isotype control. (c) Representative flow cytometry

737 plot and quantification of IgA-coated bacteria in feces of *B. ovatus* strain-E-colonized gnotobiotic

738 mice treated with either anti-CD4 antibody or isotype control. (d) Representative flow cytometry

739 plot and percentage of IgA<sup>+</sup> B cells in small intestine and the colon are shown. Numbers

740 adjacent to gates represent percentage. (e) Concentration of free IgA in the intestinal content

741 collected from different regions of the whole intestinal tract is shown. S.I.: small intestine. Data

742 shown are mean  $\pm$  standard error of the mean. Each dot represents an individual mouse. *p*-

743 values with statistical significance (assessed by two-tailed Student's *t* test) are indicated: \*\**p* <

744 0.01, \*\*\**p* < 0.001; ns, not significant.

745

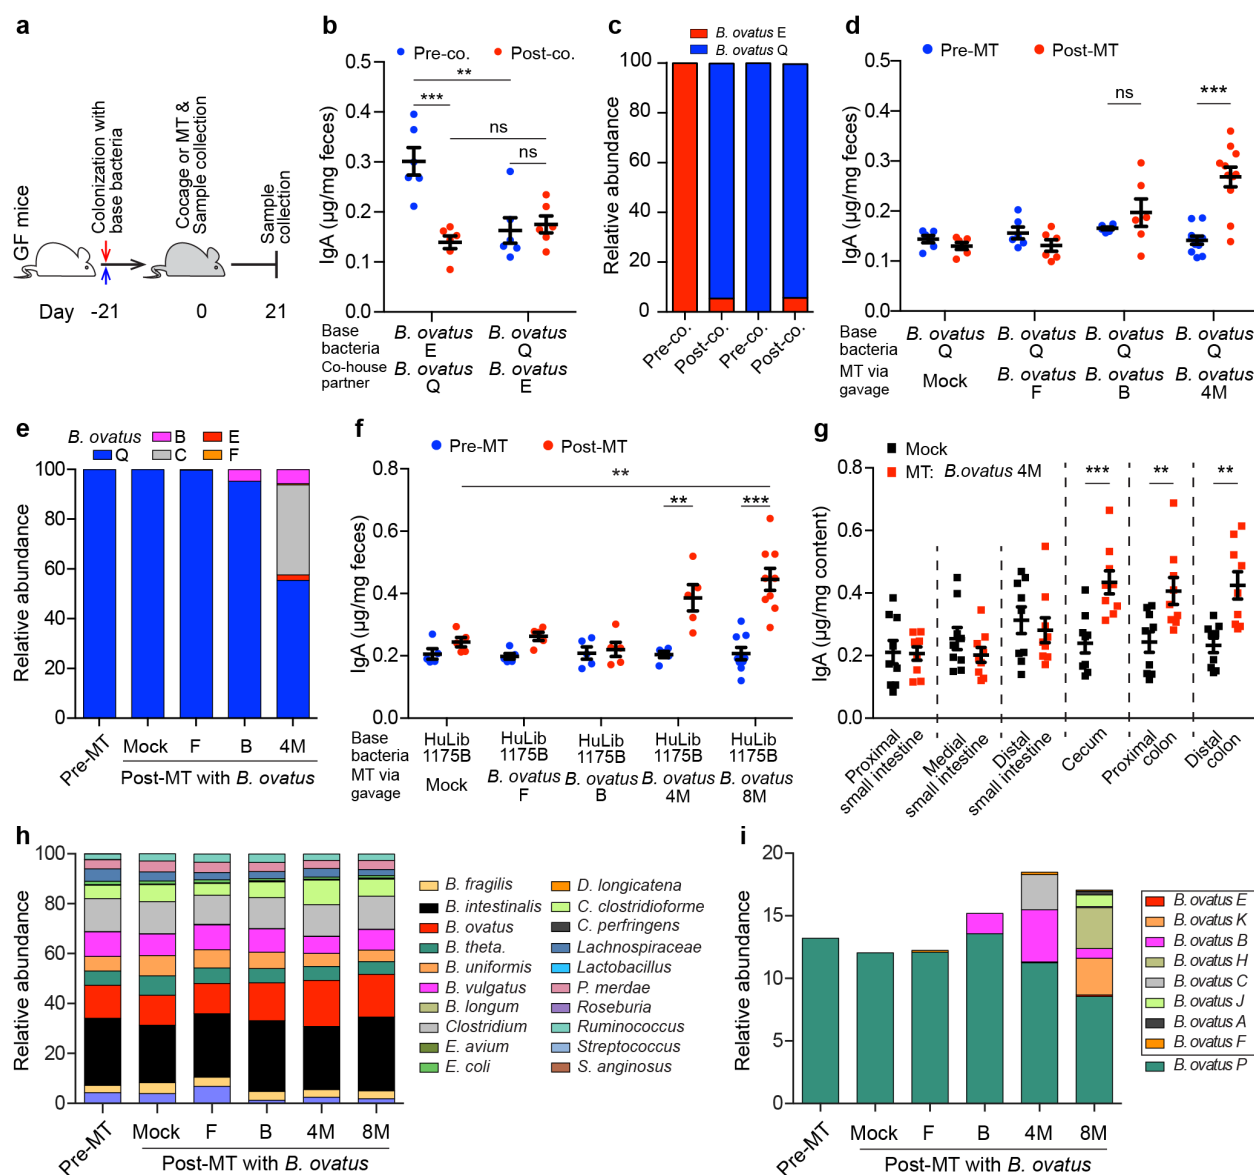

746  
 747 **Fig. 4 | Multiplex microbial strains robustly transfer high-IgA phenotype to low-IgA**  
 748 **producing mice.** (a) Schematic representation of cohousing and microbial therapeutic  
 749 strategies. (b and c) Fecal IgA concentration (b) and relative abundance of each *B. ovatus*  
 750 strain (c) in pre- and post-cohoused gnotobiotic mice, which were pre-colonized with either *B.*  
 751 *ovatus* strain E or Q. (d and e) Fecal IgA concentration (d) and relative abundance of each *B.*  
 752 *ovatus* strain (e) in mice pre- and post-microbiota-based therapeutic (MT). Mice were first  
 753 colonized with *B. ovatus* strain Q for three weeks and subsequently administered a microbial  
 754 therapeutic comprised of either an individual IgA<sup>high</sup> *B. ovatus* strain or a cocktail of IgA<sup>high</sup> *B.*

755 *ovatus* strains. (f) Fecal IgA concentration in mice pre- and post-MT, which were pre-colonized  
756 with human microbiota arrayed culture collection (e.g. HuLib1175B) for three weeks. The  
757 therapeutic was either an individual IgA<sup>high</sup> *B. ovatus* strain or a cocktail of IgA<sup>high</sup> *B. ovatus*  
758 strains. *B. ovatus* 4M: a cocktail of 4 different IgA<sup>high</sup> *B. ovatus* strains; *B. ovatus* 8M: a cocktail  
759 of 8 different IgA<sup>high</sup> *B. ovatus* strains. (g) Free IgA concentration along the intestinal tract of  
760 mice after gavage with Mock or *B. ovatus* 4M. (h) Relative abundance of bacterial species in  
761 mice pre- and post-MT. (i) Relative abundance of different *B. ovatus* strains in mice pre- and  
762 post-MT. Data shown are mean  $\pm$  standard error of the mean. Sequencing plots display the  
763 average abundance from five mice. Each dot represents a biological replicate. Detailed strain  
764 information is listed in [Supplementary Tables 2 and 6](#). *p*-values with statistical significance  
765 (assessed by two-tailed Student's *t* test) are indicated: \*\**p* < 0.01, \*\*\**p* < 0.001; ns, not  
766 significant.  
767
