# Supplementary material for: Strain-level differences in gut microbiome composition determine fecal IgA levels and are modifiable by gut microbiota manipulation
Source: bioRxiv or medRxiv preprint supplement (doi:10.1101/544015), 2019-08-22
Supplement: Supplementary file [file media-1.pdf]

828 **Supplemental information**

829 **Supplemental methods**

830 **Quantification of immunoglobulins by ELISA**

831 Like the quantification of total fecal IgA, serum immunoglobulin isotypes (IgA, IgG1, IgG2a,  
832 IgG2b, IgG3, IgM and IgE) were also detected using sandwich ELISA following the same  
833 procedures as the quantification of fecal IgA except for using different capture and detection  
834 antibody pairs (all following antibodies were purchased from Southern Biotechnology  
835 Associates, Inc. if not indicated otherwise): goat anti-mouse IgA, goat anti-mouse IgG1, goat  
836 anti-mouse IgG2a, goat anti-mouse IgG2b, goat anti-mouse IgG3, rat anti-mouse IgE, rat anti-  
837 mouse IgM, goat anti-mouse IgG-HRP, goat anti-mouse IgE-HRP, goat anti-mouse IgM-HRP  
838 and goat anti-mouse IgA-HRP (Sigma-Aldrich). Corresponding mouse immunoglobulin isotypes  
839 were used as standards after serial dilutions.

840

841 **RNA isolation**

842 Excised small intestine and colon from gnotobiotic mice that were colonized for three weeks  
843 with *B. ovatus* E or Q strains were kept in RNA<sup>later</sup> RNA Stabilization Reagent (Qiagen, 76104)  
844 and stored at -20°C freezer until future processing. Total RNA was extracted with the RNeasy  
845 Mini Kit (Qiagen, 74104) according to manufacture's protocol. The concentration and quality of  
846 RNA was analyzed with a NanoDrop™ 8000 Spectrophotometer (Thermo Fisher Scientific,  
847 USA).

848

849 **Quantification of mRNA by quantitative RT-PCR**

850 The cDNA for each sample was synthesized with High-Capacity cDNA Reverse Transcription  
851 Kits (Applied Biosystems, 4368813). The StepOne Real-Time PCR System (Applied  
852 Biosystems, USA) was used for PCR amplification of the cDNAs with Applied Biosystems™  
853 Power SYBR™ Green Master Mix and oligonucleotide primer pairs specific for pIgR, Muc2 and

854 glyceraldehydes-3-phosphate dehydrogenase (GAPDH) mRNAs. The primer sequences were  
855 as follows: GAPDH forward primer, 5'-TGAACGGGAAGCTCACTGG-3'; GAPDH reverse  
856 primer, 5'-TCCACCACCCTGTTGCTGTA-3'; pIgR forward primer, 5'-  
857 AGGCAATGACAACATGGGG-3'; pIgR reverse primer, 5'-ATGTCAGCTTCCTCCTTGG-3'  
858 (Nakamura et al., 2012); Muc2 forward primer, 5'-GCTGACGAGTGGTTGGTGAATG-3'; Muc2  
859 reverse primer, 5'-GATGAGGTGGCAGACAGGAGAC-3' (Wlodarska et al., 2011). The following  
860 parameters were set for cDNA amplification and quantification: 30 seconds at 95°C, and then 40  
861 cycles of denaturation at 95°C for 15 seconds and annealing at 60°C for 1 minutes. The mRNA  
862 level of test gene was normalized to GAPDH according to the formula:  $(2^{-C_{T\text{ test}} - C_{T\text{ GAPDH}}}) \times 100\%$ .

863

#### 864 **Scanning electron microscopy**

865 The morphology of *B. ovatus* in mouse colonic tissue was observed under scanning electron  
866 microscopy (SEM). Colon tissues were excised from gnotobiotic mice colonized for three weeks  
867 with either *B. ovatus* strain E or Q and fixed in 3% glutaraldehyde buffer overnight at 4°C.  
868 Samples were then washed gently in 0.2 M sodium cacodylate buffer to remove residual fixative  
869 and re-fixed with 1% osmium tetroxide/0.2 M cacodylate buffer for one hour. After complete  
870 drying, samples were first coated with gold particles and observed with a HITACHI S-4300 SEM  
871 (HITACHI, Japan).

872

#### 873 **Treatment of gnotobiotic mice with FTY720**

874 Germ-free mice were administered 2-Amino-2-[2-(4-octyl-phenyl)-ethyl]-propane-1,3-diol  
875 hydrochloride (FTY720) (Sigma-Aldrich, SML0700) by i.p. at 1 µg/g body weight, as previously  
876 described (Kunisawa et al., 2007; Ruane et al., 2013). Three days after the initial treatment,  
877 mice were colonized with *B. ovatus* strain E and injected FTY720 by i.p. followed by treatment  
878 with FTY720 every three days for a period of three weeks. PBS was used in control mice. At the

879 end of the experiment, content from different regions of the intestinal tract was harvested and  
880 subject to IgA quantification by ELISA.

881

## 882 **Supplemental results**

### 883 **IgA<sup>high</sup> *B. ovatus* strains induce comparable level of fecal IgA to Taconic SPF microbiota**

884 Segmented filamentous bacterium (SFB) has been described as a potent fecal IgA inducer  
885 (Talham et al., 1999). As a reference to compare with IgA levels induced by diverse human gut  
886 microbial strains, we measured fecal IgA in C57Bl/6 mice from three mouse vendors. Taconic  
887 SPF mice, that are known to be colonized by SFB (Ivanov et al., 2009), produced more IgA in  
888 their stool than other mice (i.e. JAX SPF mice and Charles River SPF mice) (Figure S2D).  
889 However, the concentration of stool IgA in Taconic mice was comparable to that of gnotobiotic  
890 mice colonized with a single IgA<sup>high</sup> *B. ovatus* strain (Figure 1F and S2D) suggesting that *B.*  
891 *ovatus* IgA<sup>high</sup> stains are as efficient as SFB in fecal IgA induction in mice.

892

### 893 ***B. ovatus* induce development of IgA-secreting cells locally in the large intestine**

894 Well-organized follicular structures such as Peyer's patches (PPs) in the small intestine are the  
895 most prominent IgA inductive sites. We determined whether IgA<sup>high</sup> *B. ovatus*-induced IgA-  
896 secreting cells residing in the LP of the large intestine had emerged from the small intestinal IgA  
897 inductive sites (e.g. PPs). To address this question, we took advantage of FTY720, an S1PR1  
898 agonist, which blocks the cellular egress from secondary lymphoid tissues (Kunisawa et al.,  
899 2007). We found that, in general, FTY720-treated and untreated control mice generated  
900 comparable fecal IgA after three weeks of colonization (Figure S12A). However, the treated  
901 mice, compared to controls, had significantly less luminal IgA in the distal small intestine but not  
902 in the large intestinal regions (Figure S12B). These results suggest local development of IgA-  
903 secreting B cells in the colon might be the mechanism driving elevated colonic IgA induced by

904 IgA<sup>high</sup> strains or that IgA<sup>high</sup> *B. ovatus* strains promote the survival of IgA-secreting cells in the  
905 colon (Fagarasan et al., 2010; Masahata et al., 2014).  
906

907 Supplemental figures

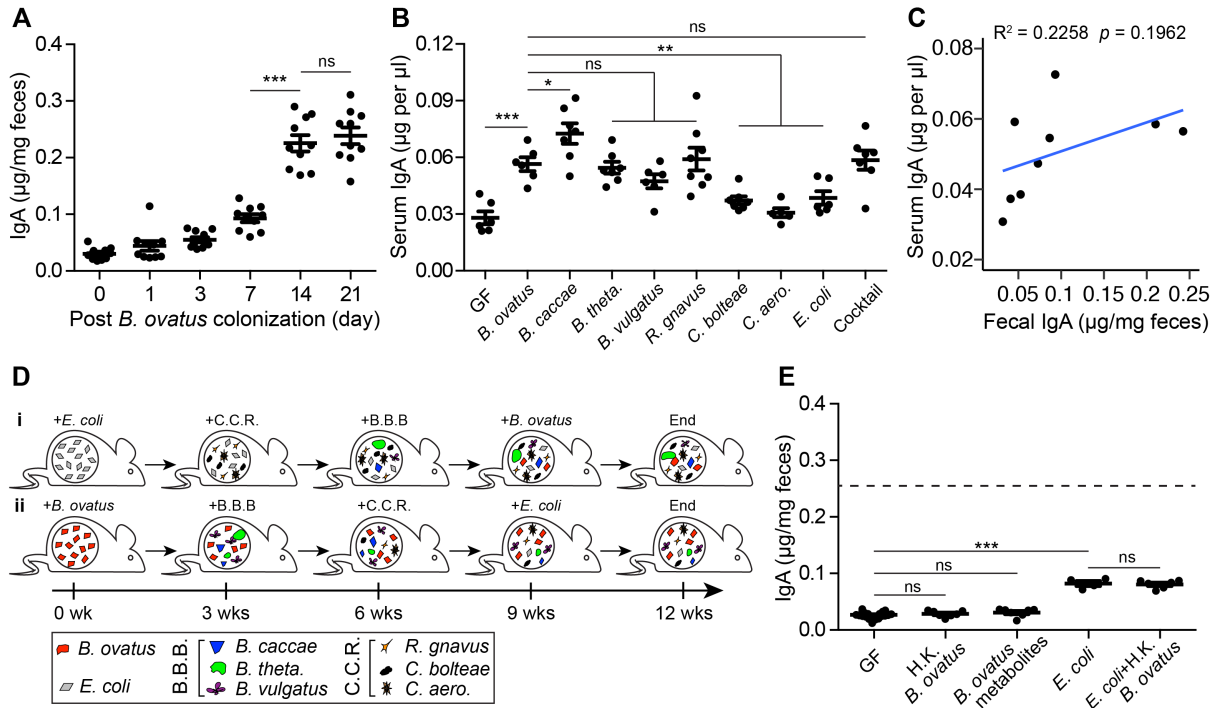

908  
 909 **Figure S1. *B. ovatus* species do not induce more serum IgA production than other**  
 910 **bacterial species, related to Figure 1. (A)** Fecal IgA dynamics in gnotobiotic mice after  
 911 colonization with *B. ovatus* strain E. **(B)** Total serum IgA concentration in gnotobiotic mice that  
 912 were colonized with individual or a cocktail of eight bacterial species for three weeks. **(C)**  
 913 Correlation of IgA concentration in stool and serum in mice inoculated with different bacterial  
 914 species. The average concentrations of stool IgA in Figure 1A and serum IgA in Figure S1B  
 915 were used for plotting. **(D)** Gnotobiotic mice were serially colonized with different bacteria every  
 916 three weeks. Before each new bacteria addition, stool samples were collected for further  
 917 analysis. **(E)** Fecal IgA concentration in mice treated with either heat-killed (H.K.) *B. ovatus* or *B.*  
 918 *ovatus* metabolites (i.e. filtered, conditioned growth medium from stationary phase of *B. ovatus*  
 919 cultures). The right side of this plot shows fecal IgA concentration in *E. coli*-precolonized  
 920 gnotobiotic mice, which were then treated with H.K.-*B. ovatus*. Either metabolites of *B. ovatus* in  
 921 culture medium or H.K.-*B. ovatus* was used to feed mice, accordingly, for the duration of the  
 922 experiments. Dotted line indicates the average level of stool IgA induced by viable *B. ovatus*

923 strain E. Data shown are mean  $\pm$  standard error of the mean. Each dot represents a biological  
924 replicate. Detailed strain information is listed in [Table S1](#).  $p$ -values with statistical significance  
925 (assessed by two-tailed Student's  $t$  test) are indicated: \*\*\* $p < 0.001$ ; ns, not significant.  
926

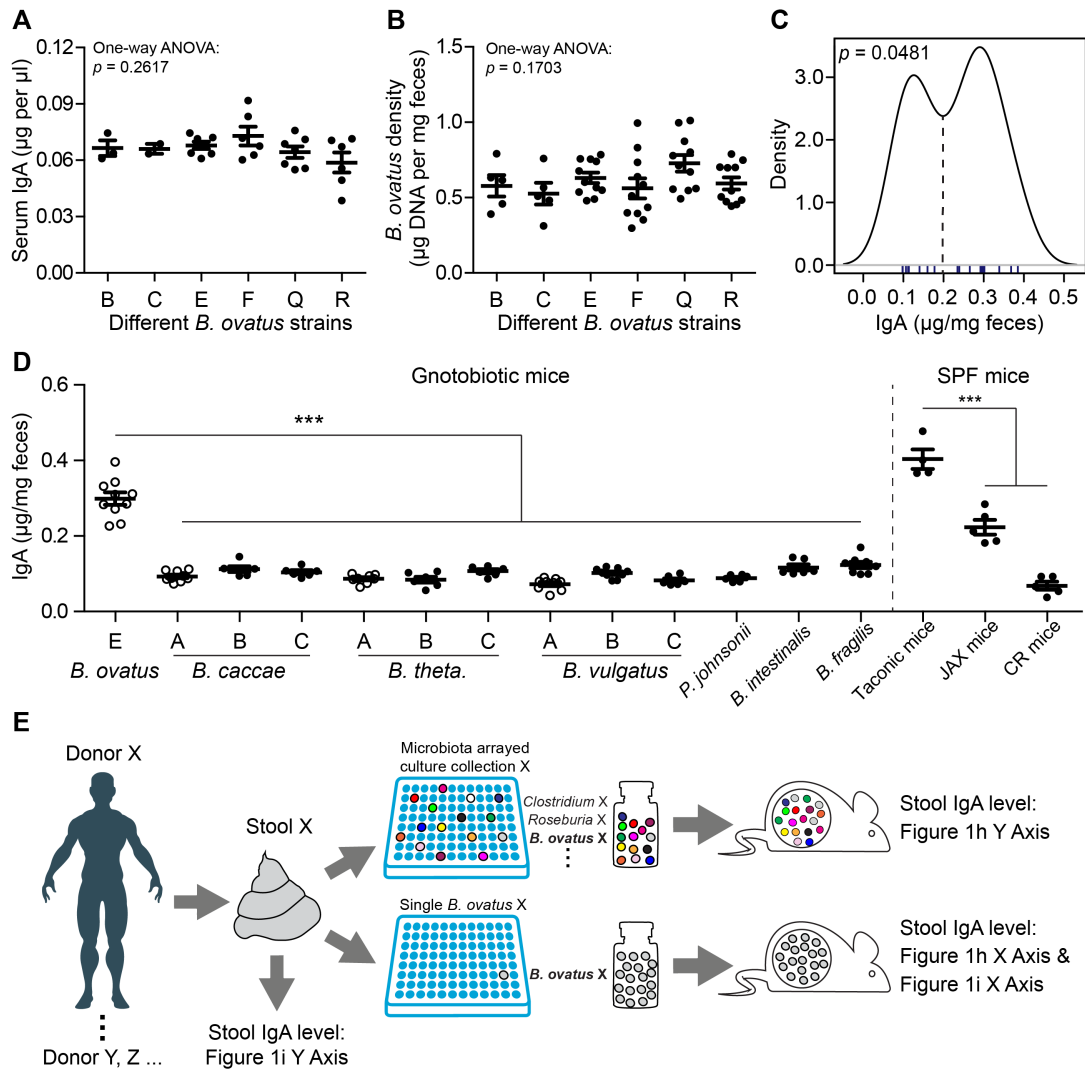

927

928 **Figure S2. Strain-level variation in fecal IgA induction was not observed in other tested**

929 **bacterial species, related to Figure 1. (A)** Total serum IgA level in gnotobiotic mice harboring

930 different strains of *B. ovatus*. **(B)** *B. ovatus* density in the stool of gnotobiotic mice colonized with

931 different *B. ovatus* strains. **(C)** Binomial distribution of *B. ovatus* strains in IgA induction. **(D)**

932 Fecal IgA concentration in mice colonized with different strains of *B. caccae*, *B. theta*, *B.*

933 *vulgatus* and other Bacteroidales, such as *P. johnsonii*, *B. intestinalis* and *B. fragilis* and in SPF

934 B6 mice purchased from different vendors. Taconic mice were purchased from Taconic

935 Biosciences; JAX mice were purchased from The Jackson Laboratory and CR mice were

936 purchased from Charles River Laboratories. Data with open circle were replotted from [Figure 1A](#)

937 to facilitate comparison. (E) Experiment schema of the Figures 1H and 1I. Data shown are  
938 mean  $\pm$  standard error of the mean. Each dot represents a biological replicate. Detailed strain  
939 information is listed in [Tables S2 and S7](#).  $p$ -values with statistical significance (assessed by two-  
940 tailed Student's  $t$  test or one-way ANOVA) are indicated: \*\*\* $p < 0.001$ ; ns, not significant.  
941



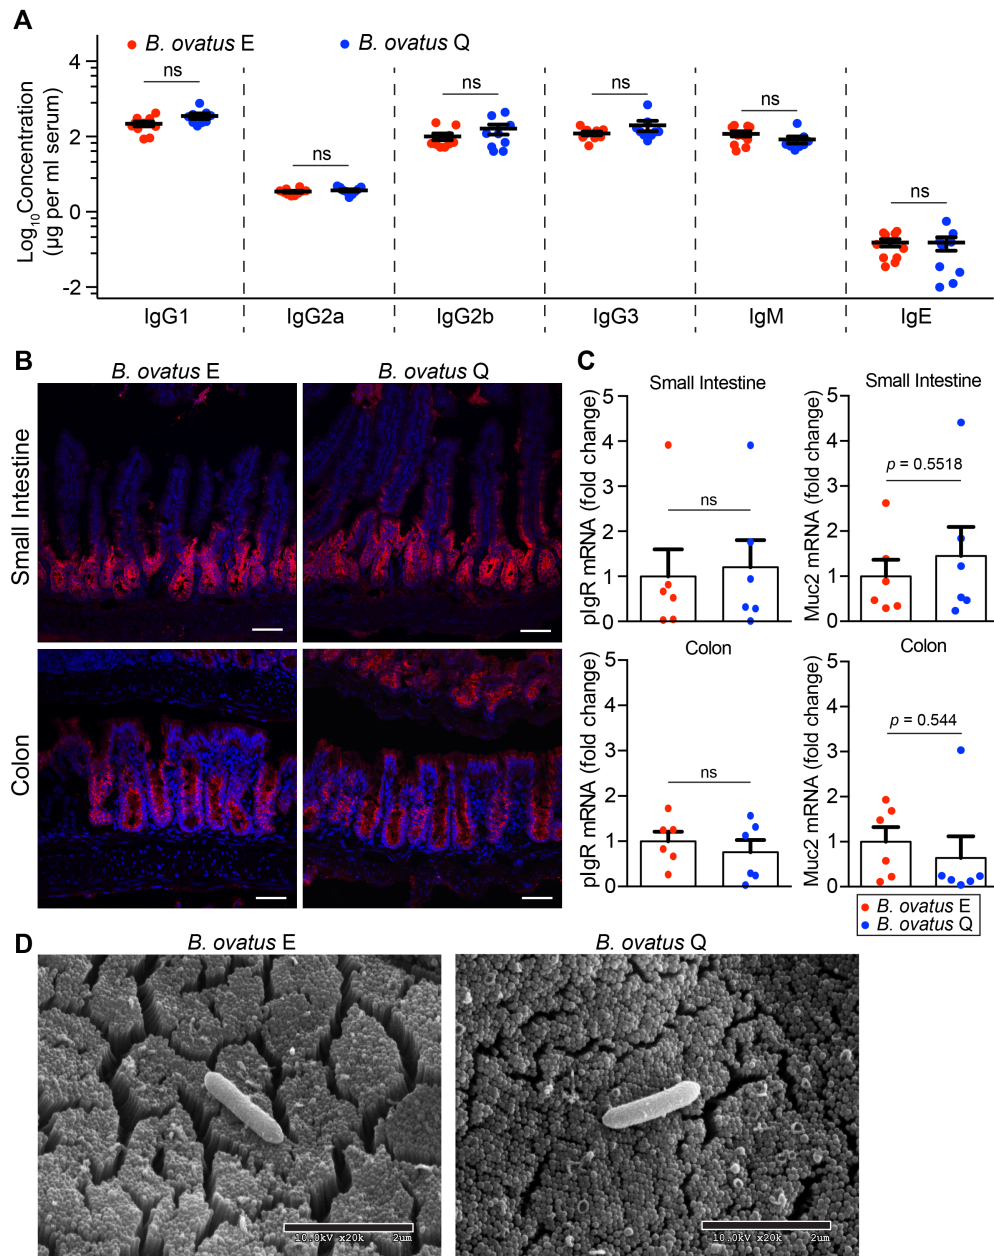

942

943 **Figure S3. *B. ovatus* strains E and Q induced comparable levels of different serum**  
 944 **immunoglobulin isotypes, plgR and Muc2 expression in both small intestine and the**  
 945 **colon, related to Figure 2. (A) Total serum IgG1, IgG2a, IgG2b, IgG3, IgM and IgE in**  
 946 **gnotobiotic mice colonized with either *B. ovatus* strain E or Q. (B) Colonic and ileal sections**  
 947 **from *B. ovatus* strain E or Q colonized mice were stained with anti-plgR (Red) and DAPI (4',6-**  
 948 **diamidino-2-phenylindole) (Blue). Representative images are shown (n = 4-6 mice per group).**  
 949 **Scale Bars = 50 µm. Data shown are mean ± standard error of the mean. (C) The fold change**

950 of plgR mRNA level (left) and Muc2 mRNA level (right) in the small intestine and colon of mice  
951 colonized for three weeks with *B. ovatus* strain E or Q. **(D)** The morphology of *B. ovatus* strain E  
952 or Q in gnotobiotic mice colon. Scale Bars = 2  $\mu$ m. Each dot represents a biological replicate. *p*-  
953 values with statistical significance (assessed by unpaired two-tailed Student's *t* test) are  
954 indicated: \**p* < 0.05; ns, not significant.  
955

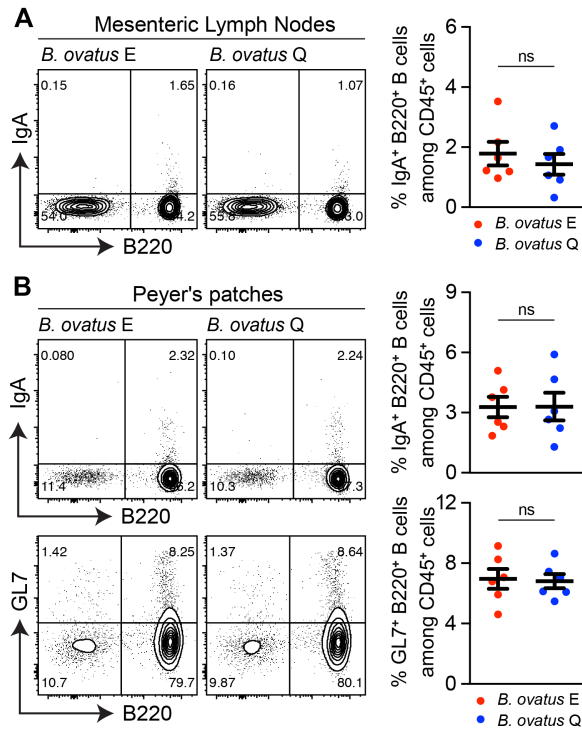

956

957 **Figure S4. Quantification of IgA<sup>+</sup>B220<sup>+</sup> B cells in MLNs, PPs in *B. ovatus* strain E or Q**

958 **harboring gnotobiotic mice, related to Figure 2. (A)** Representative flow cytometry plot and

959 quantification of IgA<sup>+</sup> B cells in mesenteric lymph nodes. **(B)** Representative flow cytometry plot

960 and quantification of IgA<sup>+</sup> B cell and germinal center B cells (GL7<sup>+</sup>B220<sup>+</sup>) in PPS. Number

961 adjacent to gate represents percentage. Data shown are mean ± standard error of the mean.

962 Each dot represents an individual mouse. *p*-values with statistical significance (assessed by

963 unpaired two-tailed Student's *t* test) are indicated: \**p* < 0.05; ns, not significant.

964

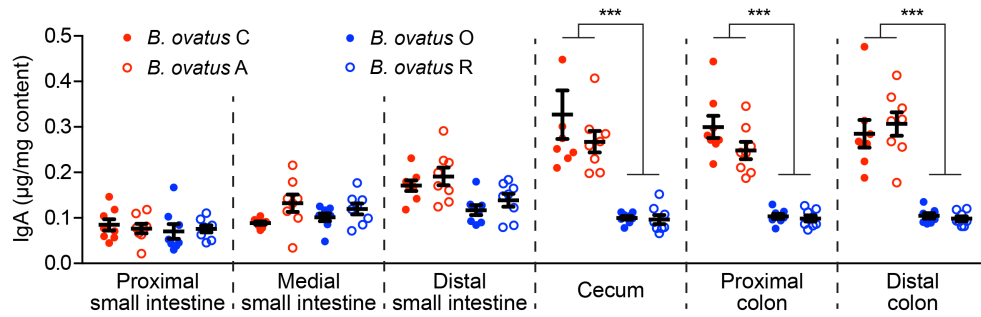

965

966 **Figure S5. IgA<sup>high</sup> *B. ovatus* strains specifically induced more fecal IgA production in the**

967 **large intestinal regions than IgA<sup>low</sup> *B. ovatus* strains, related to Figure 2. Free IgA**

968 concentration in different regions along the whole intestinal tract of mice that were colonized

969 with individual *B. ovatus* strains (IgA<sup>high</sup> *B. ovatus* strains A and C; IgA<sup>low</sup> *B. ovatus* strains O and

970 R) for three weeks. Data shown are mean ± standard error of the mean. Each dot represents a

971 biological replicate. Detailed strain information is listed in [Table S2](#). *p*-values with statistical

972 significance (assessed by unpaired two-tailed Student's *t* test) are indicated: \*\*\**p* < 0.001; ns,

973 not significant.

974

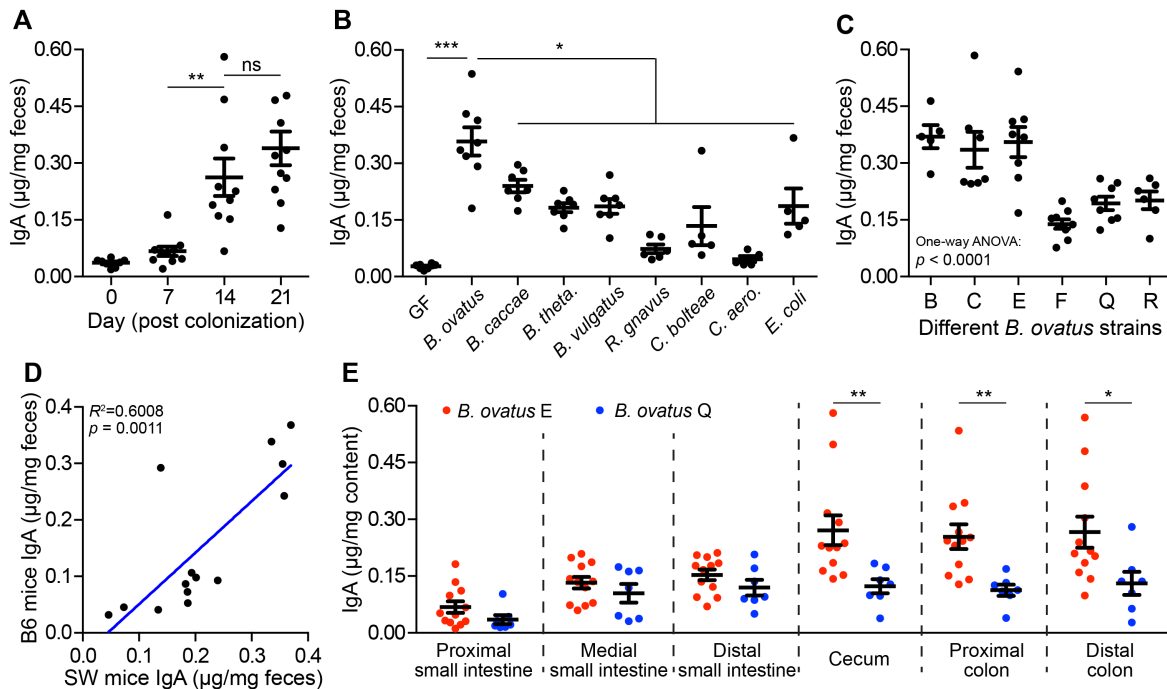

975

976 **Figure S6. Host genetic background has little influence on human gut bacteria induced**

977 **fecal IgA production in mice. (A)** Dynamics of fecal IgA concentration in gnotobiotic Swiss

978 Webster mice colonized with *B. ovatus* strain E. **(B and C)** Fecal IgA concentration in

979 gnotobiotic Swiss Webster mice colonized with different bacterial species **(B)** or various strains

980 of *B. ovatus* **(C)**. **(D)** Correlation of fecal IgA produced by B6 mice and Swiss Webster mice after

981 the same bacteria colonization. The average fecal IgA level of Swiss Webster mice in **(B)** and

982 **(C)** were plotted against the average fecal IgA level in C57BL6/J mice that were colonized with

983 the same bacterial species or strain from Figure 1A and Figure 1F. **(E)** Luminal IgA

984 concentration along the whole intestine in Swiss Webster mice colonized with either *B. ovatus*

985 strains E or Q. Data shown are mean  $\pm$  standard error of the mean. Each dot represents a

986 biological replicate in **A, B, C** and **E**. Detailed strain information is listed in [Tables S1 and S2](#).  $p$ -

987 values with statistical significance (assessed by two-tailed Student's  $t$  test or one-way ANOVA)

988 are indicated: \* $p < 0.05$ , \*\* $p < 0.01$ , \*\*\* $p < 0.001$ ; ns, not significant.

989

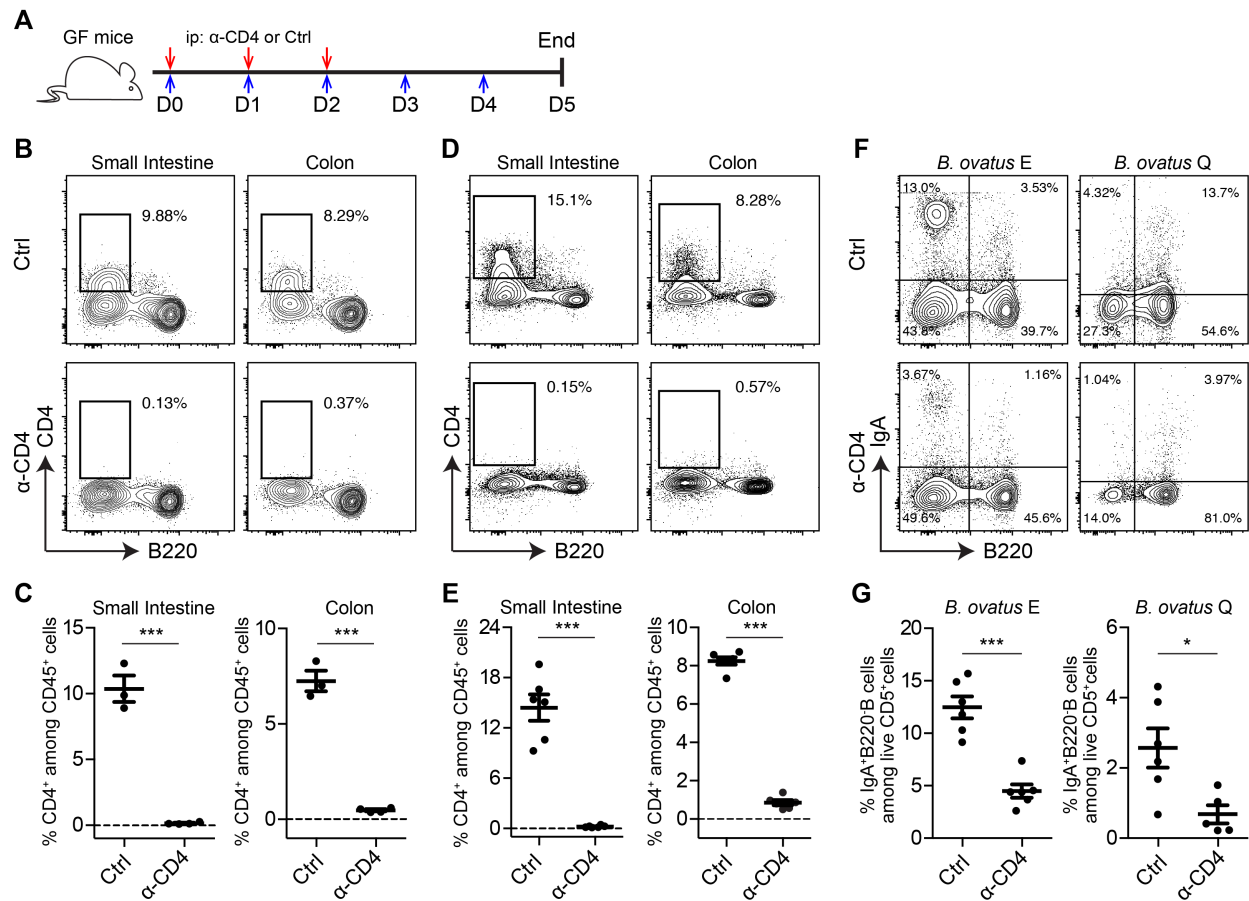

990

991 **Figure 7. Anti-CD4 antibody promptly and robustly depleted CD4<sup>+</sup> T cells in multiple**

992 **organs of germ-free and gnotobiotic mice, related to Figure 3. (A) Schematic**

993 **representation of anti-CD4 antibody injection. GF mice were injected intraperitoneally with anti-**

994 **CD4 antibody or isotype control for three consecutive days (0.5 mg/mouse/day). Three days**

995 **after the last injection, tissues were collected and processed. Red arrows indicate antibody**

996 **injection and blue arrows represent time. (B and C) Representative flow cytometry plot (B) and**

997 **quantification (C) of CD4<sup>+</sup> T cells in the LP of small intestine and colon in germ-free mice. (D**

998 **and E) Representative flow cytometry plot (D) and quantification (E) of CD4<sup>+</sup> T cells in LP of**

999 **small intestine and colon of gnotobiotic mice colonized with *B. ovatus* strain E with or without**

1000 **anti-CD4 antibody treatment. (F and G) Representative flow cytometry plot (F) and**

1001 **quantification (G) of IgA<sup>+</sup>B220<sup>-</sup> cells in the LP of small intestine of gnotobiotic mice colonized**

1002 **with *B. ovatus* strain E or Q w/o anti-CD4 antibody treatment. Number adjacent to gate**

1003 represents percentage. Data shown are mean  $\pm$  standard error of the mean. Each dot  
1004 represents a biological replicate.  $p$ -values with statistical significance (assessed by unpaired  
1005 two-tailed Student's  $t$  test) are indicated: \* $p$  < 0.05, \*\*\* $p$  < 0.001; ns, not significant.  
1006

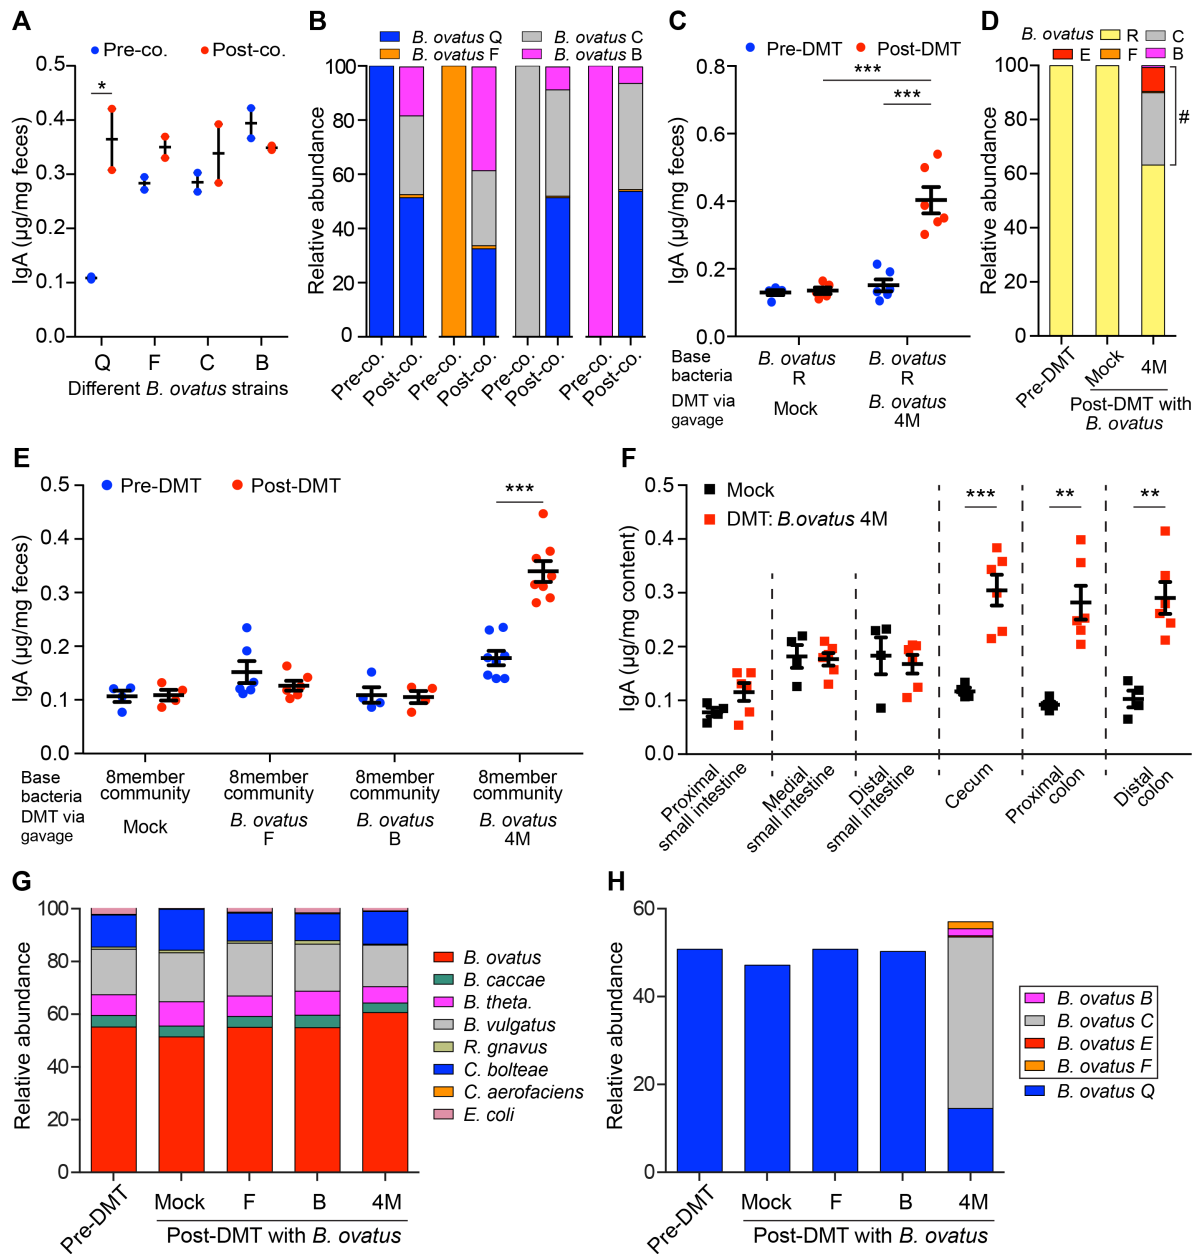

1007

1008 **Figure S8. Multiplex cocktail of microbial strains overcome phenotype transfer resistance**

1009 **in gnotobiotic mice that were pre-colonized with simple bacterial community, related to**

1010 **Figure 4. (A and B) Fecal IgA concentration (A) and relative abundance of each *B. ovatus***

1011 **strain (B) in pre- and post-cohoused gnotobiotic mice. Before cohousing, four groups of mice**

1012 **were pre-colonized with four individual *B. ovatus* strains, respectively, for three weeks. Then, all**

1013 **mice were cohoused together at a ratio of 1:1:1:1 for another three weeks. (C and D) Fecal IgA**

1014 **concentration (C) and relative abundance of each *B. ovatus* strain (D) in mice pre- and post-**



1015 DMT. Mice were first colonized with *B. ovatus* strain *R* for three weeks. Then the microbial  
1016 cocktail *B. ovatus* 4M was administered. (E) Fecal IgA concentration in mice pre- and post-  
1017 DMT, which were pre-colonized with eight-member bacterial community for three weeks. The  
1018 microbial cocktail consisted of either an individual IgA<sup>high</sup> *B. ovatus* strain or *B. ovatus* 4M. (F)  
1019 Luminal IgA concentration along the intestinal tract of mice after gavage with Mock (PBS) or *B.*  
1020 *ovatus* 4M. (G) Relative abundance of each bacterial species in mice pre- and post-DMT. (H)  
1021 Relative abundance of different *B. ovatus* strains in mice pre- and post-DMT. Data shown are  
1022 mean ± standard error of the mean. Sequencing plots display the average abundance from five  
1023 mice. Each dot represents a biological replicate. Detailed bacteria information is listed in [Tables](#)  
1024 [S2, S4 and S5](#). *p*-values with statistical significance (assessed by two-tailed Student's *t* test) are  
1025 indicated: \**p* < 0.05, \*\**p* < 0.01, \*\*\**p* < 0.001; ns, not significant.  
1026

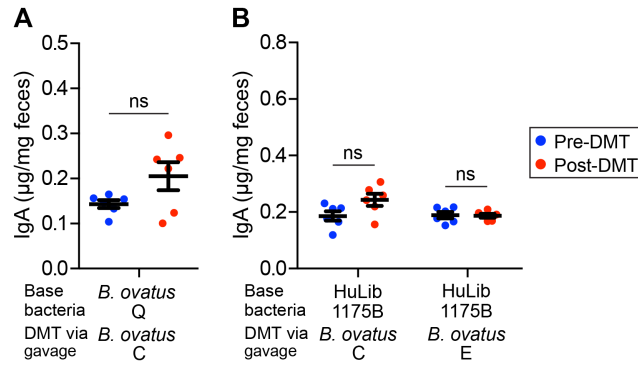

1027

1028 **Figure S9. *B. ovatus* strain C and E individually do not convert low-IgA to high-IgA**

1029 **producing mice, related to Figure 4. (A)** Fecal IgA concentration in gnotobiotic mice pre-DMT

1030 and post-DMT. Before DMT, mice were pre-colonized with *B. ovatus* strain Q for three weeks.

1031 **(B)** Fecal IgA concentration in gnotobiotic mice pre-DMT and post-DMT. Mice were pre-

1032 colonized with microbiota arrayed culture collections (i.e. HuLib1175B) for three weeks. Data

1033 shown are mean ± standard error of the mean. Each dot represents a biological replicate. *p*-

1034 values with statistical significance (assessed by unpaired two-tailed Student's *t* test) are

1035 indicated: \**p* < 0.05; ns, not significant.

1036

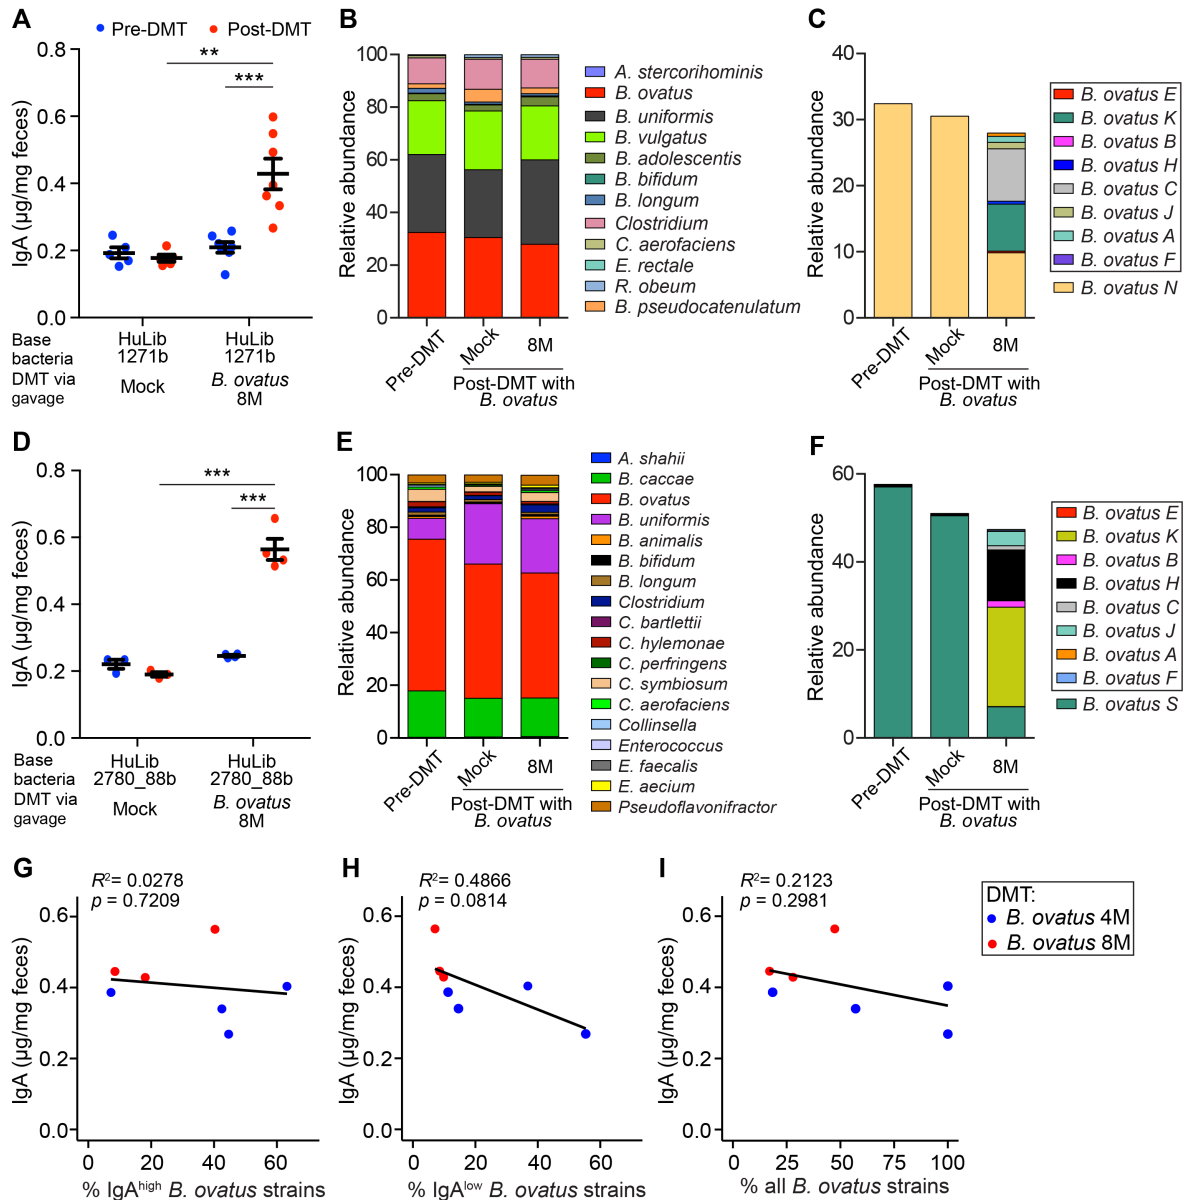

1037

1038

1039

1040

1041

1042

1043

1044

**Figure S10. Robust modification of fecal IgA level with *B. ovatus* cocktails in gnotobiotic mice that were pre-colonized with microbiota arrayed culture collections, related to Figure 4. (A-F) Fecal IgA concentration (A and D), relative abundance of each bacterial species (B and E) and relative abundance of different *B. ovatus* strains (C and F) in gnotobiotic mice pre- and post-DMT. Mice were pre-colonized with microbiota arrayed culture collections (A: HuLib1271b; D: HuLib2780\_88b) for three weeks. Mice were then gavaged with *B. ovatus* 8M. (G-I) Correlation between fecal IgA level and relative abundance of IgA<sup>high</sup> (G), IgA<sup>low</sup> (H) and**

1045 total *B. ovatus* strains (**I**). The averages of fecal IgA level and bacteria relative abundance were  
1046 used. All mice, being pre-colonized with either single bacterial strain or complex bacterial  
1047 community for three weeks, were gavaged with either *B. ovatus* 4M or *B. ovatus* 8M. In **A** and **D**  
1048 plots, data shown are mean  $\pm$  standard error of the mean and each dot represents a biological  
1049 replicate. Sequencing plots display the average abundance from three to five mice. Detailed  
1050 strain information is listed in [Tables S4 and S6](#). *p*-values with statistical significance (assessed  
1051 by two-tailed Student's *t* test) are indicated: \**p* < 0.05, \*\**p* < 0.01, \*\*\**p* < 0.001; ns, not  
1052 significant.  
1053

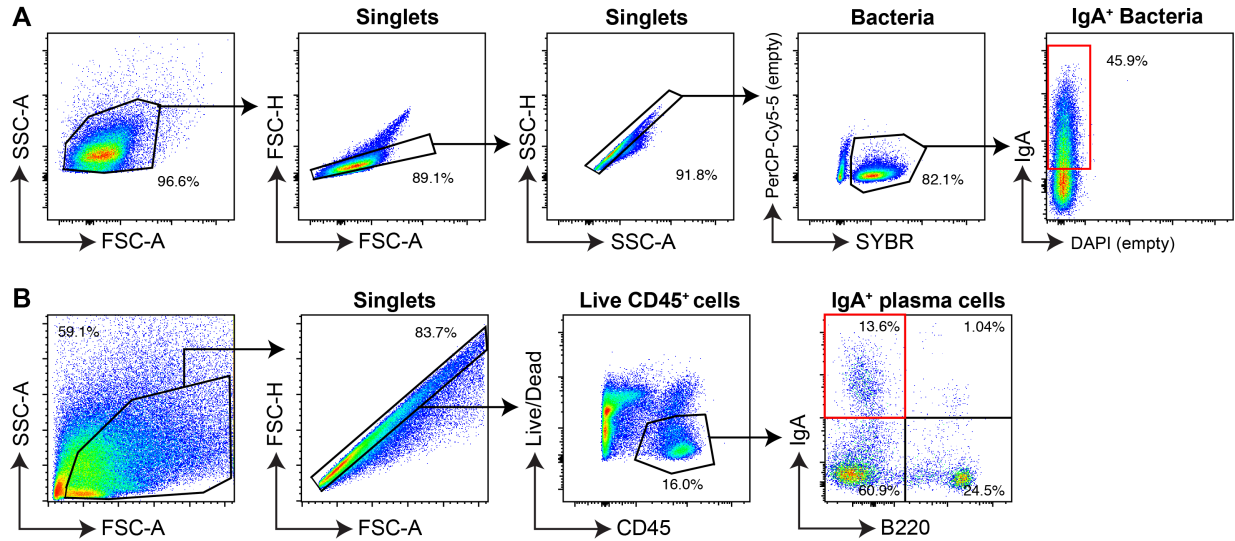

1054

1055

1056

1057

1058

1059

**Figure S11. Representative flow cytometry gating strategies for IgA-coated bacteria and IgA-secreting cells. (A)** IgA-coated bacteria in stool were defined as SYBR<sup>+</sup>IgA<sup>+</sup>. **(B)** IgA-secreting B cells in the LP of small intestine and colon were defined as Zombie Aqua<sup>-</sup> CD45<sup>+</sup>IgA<sup>+</sup>B220<sup>-</sup>.

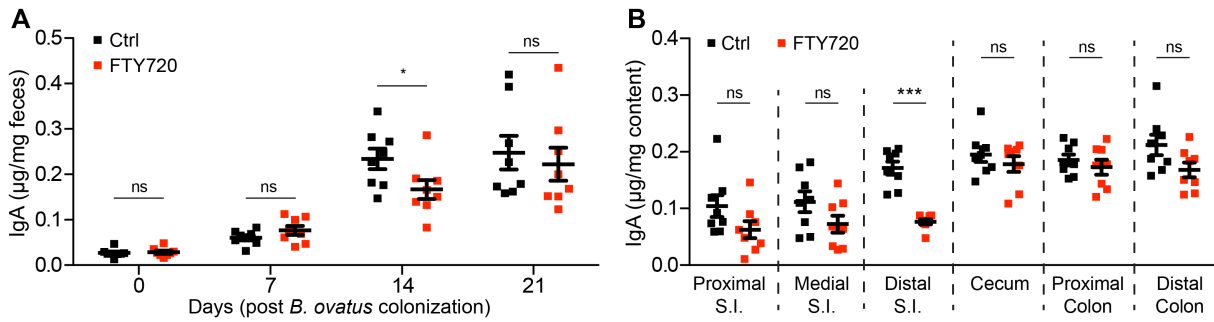

1060

1061 **Figure S12. FTY720 influences luminal IgA production in the distal small intestine but not**

1062 **other regions in mice colonized with *B. ovatus* strain E. (A) Dynamics of fecal IgA**

1063 **concentration in *B. ovatus* strain E colonized gnotobiotic B6 mice treated with or without**

1064 **FTY720. (B) Free IgA concentration in different regions along the whole intestinal tract of**

1065 **gnotobiotic mice, which were colonized with *B. ovatus* strains E for three weeks, with or without**

1066 **FTY720 treatment. Data shown are mean ± standard error of the mean. Each dot represents a**

1067 **biological replicate. *p*-values with statistical significance (assessed by unpaired two-tailed**

1068 **Student's *t* test) are indicated: \**p* < 0.05, \*\*\**p* < 0.001; ns, not significant.**

1069

1070 **Supplemental tables**

1071 **Table S1. Information for each bacterial strain.**

| <b>Phylum</b>  | <b>Species</b>                      | <b>Strain</b>    |
|----------------|-------------------------------------|------------------|
| Bacteroidetes  | <i>Bacteroides ovatus</i>           | ATCC®8483        |
| Bacteroidetes  | <i>Bacteroides caccae</i>           | ATCC®43185       |
| Bacteroidetes  | <i>Bacteroides thetaiotaomicron</i> | ATCC®VPI5482     |
| Bacteroidetes  | <i>Bacteroides vulgatus</i>         | ATCC®8482        |
| Firmicutes     | <i>Ruminococcus gnavus</i>          | ATCC®29149       |
| Firmicutes     | <i>Clostridium bolteae</i>          | ATCC®BAA-613     |
| Actinobacteria | <i>Collinsella aerofaciens</i>      | ATCC® 25986      |
| Proteobacteria | <i>Escherichia coli</i>             | ATCC®K-12 MG1655 |

1072

1073

1074 **Table S2. Details for different *B. ovatus* strains.**

| <b>Phylum</b> | <b>Species</b>            | <b>Strain</b>              | <b>Strain Abbreviation</b> |
|---------------|---------------------------|----------------------------|----------------------------|
| Bacteroidetes | <i>Bacteroides ovatus</i> | BSD2780_12_0875_150380_E1  | <i>B. ovatus</i> A         |
| Bacteroidetes | <i>Bacteroides ovatus</i> | 1001095IJ_161003_A6        | <i>B. ovatus</i> B         |
| Bacteroidetes | <i>Bacteroides ovatus</i> | 1001283B150210_160208_F9   | <i>B. ovatus</i> C         |
| Bacteroidetes | <i>Bacteroides ovatus</i> | 1001217B_150727_E1         | <i>B. ovatus</i> D         |
| Bacteroidetes | <i>Bacteroides ovatus</i> | ATCC_8483                  | <i>B. ovatus</i> E         |
| Bacteroidetes | <i>Bacteroides ovatus</i> | BSD3178_07_1175_160815_A10 | <i>B. ovatus</i> F         |
| Bacteroidetes | <i>Bacteroides ovatus</i> | BSD3448_08_0949_C3         | <i>B. ovatus</i> G         |
| Bacteroidetes | <i>Bacteroides ovatus</i> | 1001099B_141217_E5         | <i>B. ovatus</i> H         |
| Bacteroidetes | <i>Bacteroides ovatus</i> | 1001275B_160808_G11        | <i>B. ovatus</i> I         |
| Bacteroidetes | <i>Bacteroides ovatus</i> | 1001713B_170207_170306_D4  | <i>B. ovatus</i> J         |
| Bacteroidetes | <i>Bacteroides ovatus</i> | J1101437_171009_F12        | <i>B. ovatus</i> K         |
| Bacteroidetes | <i>Bacteroides ovatus</i> | 1001302B_F3                | <i>B. ovatus</i> L         |
| Bacteroidetes | <i>Bacteroides ovatus</i> | 1001136B_E5                | <i>B. ovatus</i> M         |
| Bacteroidetes | <i>Bacteroides ovatus</i> | 1001271B_150615_H2         | <i>B. ovatus</i> N         |
| Bacteroidetes | <i>Bacteroides ovatus</i> | 1001262B_160229_F6         | <i>B. ovatus</i> O         |
| Bacteroidetes | <i>Bacteroides ovatus</i> | 1001175B_160314_D1         | <i>B. ovatus</i> P         |
| Bacteroidetes | <i>Bacteroides ovatus</i> | BSD2780_06_1687_150420_H2  | <i>B. ovatus</i> Q         |
| Bacteroidetes | <i>Bacteroides ovatus</i> | 1001254J_160919_B1         | <i>B. ovatus</i> R         |
| Bacteroidetes | <i>Bacteroides ovatus</i> | BSD2780_06_1688b_171218_A7 | <i>B. ovatus</i> S         |

1075

1076



1077 **Table S3. % dissimilarity of genomic DNA sequences amongst various *B. ovatus* strains.**

|                                    |   | Different <i>B. ovatus</i> strains |      |      |      |      |      |      |      |      |      |      |      |      |      |      |      |      |      |      |
|------------------------------------|---|------------------------------------|------|------|------|------|------|------|------|------|------|------|------|------|------|------|------|------|------|------|
|                                    |   | D                                  | B    | L    | K    | A    | R    | O    | J    | N    | P    | Q    | E    | S    | F    | M    | I    | C    | G    | H    |
| Different <i>B. ovatus</i> strains | D | 0.00                               | 0.83 | 0.85 | 0.73 | 0.72 | 0.72 | 0.73 | 0.73 | 0.74 | 0.74 | 0.74 | 0.74 | 0.74 | 0.70 | 0.73 | 0.73 | 0.73 | 0.74 | 0.74 |
|                                    | B | 0.83                               | 0.00 | 0.47 | 0.61 | 0.62 | 0.62 | 0.61 | 0.72 | 0.69 | 0.68 | 0.68 | 0.71 | 0.71 | 0.73 | 0.73 | 0.71 | 0.72 | 0.73 | 0.73 |
|                                    | L | 0.85                               | 0.47 | 0.00 | 0.67 | 0.67 | 0.63 | 0.64 | 0.68 | 0.69 | 0.70 | 0.70 | 0.71 | 0.70 | 0.73 | 0.71 | 0.72 | 0.73 | 0.73 | 0.72 |
|                                    | K | 0.73                               | 0.61 | 0.67 | 0.00 | 0.40 | 0.39 | 0.38 | 0.52 | 0.46 | 0.45 | 0.45 | 0.46 | 0.47 | 0.47 | 0.49 | 0.47 | 0.47 | 0.47 | 0.48 |
|                                    | A | 0.72                               | 0.62 | 0.67 | 0.40 | 0.00 | 0.33 | 0.33 | 0.52 | 0.48 | 0.47 | 0.48 | 0.50 | 0.49 | 0.48 | 0.52 | 0.49 | 0.49 | 0.49 | 0.49 |
|                                    | R | 0.72                               | 0.62 | 0.63 | 0.39 | 0.33 | 0.00 | 0.03 | 0.50 | 0.46 | 0.47 | 0.47 | 0.50 | 0.48 | 0.48 | 0.52 | 0.50 | 0.51 | 0.51 | 0.52 |
|                                    | O | 0.73                               | 0.61 | 0.64 | 0.38 | 0.33 | 0.03 | 0.00 | 0.51 | 0.46 | 0.46 | 0.46 | 0.49 | 0.49 | 0.47 | 0.51 | 0.49 | 0.50 | 0.51 | 0.51 |
|                                    | J | 0.73                               | 0.72 | 0.68 | 0.52 | 0.52 | 0.50 | 0.51 | 0.00 | 0.32 | 0.31 | 0.32 | 0.30 | 0.30 | 0.49 | 0.49 | 0.48 | 0.49 | 0.47 | 0.48 |
|                                    | N | 0.74                               | 0.69 | 0.69 | 0.46 | 0.48 | 0.46 | 0.46 | 0.32 | 0.00 | 0.09 | 0.09 | 0.27 | 0.29 | 0.46 | 0.42 | 0.40 | 0.43 | 0.43 | 0.44 |
|                                    | P | 0.74                               | 0.68 | 0.70 | 0.45 | 0.47 | 0.47 | 0.46 | 0.31 | 0.09 | 0.00 | 0.05 | 0.25 | 0.26 | 0.46 | 0.43 | 0.41 | 0.42 | 0.42 | 0.42 |
|                                    | Q | 0.74                               | 0.68 | 0.70 | 0.45 | 0.48 | 0.47 | 0.46 | 0.32 | 0.09 | 0.05 | 0.00 | 0.25 | 0.27 | 0.46 | 0.43 | 0.41 | 0.42 | 0.42 | 0.43 |
|                                    | E | 0.74                               | 0.71 | 0.71 | 0.46 | 0.50 | 0.50 | 0.49 | 0.30 | 0.27 | 0.25 | 0.25 | 0.00 | 0.12 | 0.44 | 0.43 | 0.42 | 0.42 | 0.42 | 0.43 |
|                                    | S | 0.74                               | 0.71 | 0.70 | 0.47 | 0.49 | 0.48 | 0.49 | 0.30 | 0.29 | 0.26 | 0.27 | 0.12 | 0.00 | 0.46 | 0.45 | 0.45 | 0.44 | 0.43 | 0.43 |
|                                    | F | 0.70                               | 0.73 | 0.73 | 0.47 | 0.48 | 0.48 | 0.47 | 0.49 | 0.46 | 0.46 | 0.46 | 0.44 | 0.46 | 0.00 | 0.40 | 0.41 | 0.41 | 0.40 | 0.41 |
|                                    | M | 0.73                               | 0.73 | 0.71 | 0.49 | 0.52 | 0.52 | 0.51 | 0.49 | 0.42 | 0.43 | 0.43 | 0.43 | 0.45 | 0.40 | 0.00 | 0.19 | 0.21 | 0.20 | 0.20 |
|                                    | I | 0.73                               | 0.71 | 0.72 | 0.47 | 0.49 | 0.50 | 0.49 | 0.48 | 0.40 | 0.41 | 0.41 | 0.42 | 0.45 | 0.41 | 0.19 | 0.00 | 0.11 | 0.11 | 0.11 |
|                                    | C | 0.73                               | 0.72 | 0.73 | 0.47 | 0.49 | 0.51 | 0.50 | 0.49 | 0.43 | 0.42 | 0.42 | 0.42 | 0.44 | 0.41 | 0.21 | 0.11 | 0.00 | 0.11 | 0.10 |
|                                    | G | 0.74                               | 0.73 | 0.73 | 0.47 | 0.49 | 0.51 | 0.51 | 0.47 | 0.43 | 0.42 | 0.42 | 0.42 | 0.43 | 0.40 | 0.20 | 0.11 | 0.11 | 0.00 | 0.07 |
|                                    | H | 0.74                               | 0.73 | 0.72 | 0.48 | 0.49 | 0.52 | 0.51 | 0.48 | 0.44 | 0.42 | 0.43 | 0.43 | 0.43 | 0.41 | 0.20 | 0.11 | 0.10 | 0.07 | 0.00 |

1078

1079

1080 **Table S4. Multiplex cocktails of *B. ovatus* strains used in DMT.**

| <b>Cocktail name</b> | <b>Strain</b>      |
|----------------------|--------------------|
| <i>B. ovatus</i> 4M  | <i>B. ovatus</i> B |
|                      | <i>B. ovatus</i> C |
|                      | <i>B. ovatus</i> E |
|                      | <i>B. ovatus</i> F |
| <i>B. ovatus</i> 8M  | <i>B. ovatus</i> B |
|                      | <i>B. ovatus</i> C |
|                      | <i>B. ovatus</i> E |
|                      | <i>B. ovatus</i> F |
|                      | <i>B. ovatus</i> A |
|                      | <i>B. ovatus</i> H |
|                      | <i>B. ovatus</i> J |
| <i>B. ovatus</i> K   |                    |

1081

1082

1083 **Table S5. Bacterial strains in synthetic cocktail of diverse bacterial species (8member**  
 1084 **community).**

| <b>Phylum</b>  | <b>Species</b>                      | <b>Strain</b>             | <b>Strain Abbreviation</b> |
|----------------|-------------------------------------|---------------------------|----------------------------|
| Bacteroidetes  | <i>Bacteroides ovatus</i>           | BSD2780_06_1687_150420_H2 | <i>B. ovatus</i> Q         |
| Bacteroidetes  | <i>Bacteroides caccae</i>           | ATCC®43185                | <i>B. caccae</i>           |
| Bacteroidetes  | <i>Bacteroides thetaiotaomicron</i> | ATCC®VPI5482              | <i>B. theta.</i>           |
| Bacteroidetes  | <i>Bacteroides vulgatus</i>         | ATCC®8482                 | <i>B. vulgatus</i>         |
| Firmicutes     | <i>Ruminococcus gnavus</i>          | ATCC®29149                | <i>R. gnavus</i>           |
| Firmicutes     | <i>Clostridium bolteae</i>          | ATCC®BAA-613              | <i>C. bolteae</i>          |
| Actinobacteria | <i>Collinsella aerofaciens</i>      | ATCC® 25986               | <i>C. aero.</i>            |
| Proteobacteria | <i>Escherichia coli</i>             | ATCC®K-12 MG1655          | <i>E. coli</i>             |

1085

1086

1087 **Table S6. Bacterial composition in different microbiota arrayed culture collections.**

| Library Name  | Phylum                                       | Species                                    | Strain                                     | Strain Abbreviation         |
|---------------|----------------------------------------------|--------------------------------------------|--------------------------------------------|-----------------------------|
| HuLib1175B    | Bacteroidetes                                | <i>Bacteroides eggerthii</i>               | 1001175st1_B5_1001175B_160314              | <i>B. eggerthii</i>         |
|               | Bacteroidetes                                | <i>Bacteroides fragilis</i>                | 1001175st1_C3_1001175B_160314              | <i>B. fragilis</i>          |
|               | Bacteroidetes                                | <i>Bacteroides intestinalis</i>            | 1001175st1_A4_1001175B_160314              | <i>B. intestinalis</i>      |
|               | Bacteroidetes                                | <i>Bacteroides ovatus</i>                  | 1001175st1_E11_1001175B_160314             | <i>B. ovatus</i>            |
|               | Bacteroidetes                                | <i>Bacteroides thetaiotaomicron</i>        | 1001175st1_E5_1001175B_160314              | <i>B. theta.</i>            |
|               | Bacteroidetes                                | <i>Bacteroides uniformis</i>               | 1001175st1_F6_1001175B_160314              | <i>B. uniformis</i>         |
|               | Bacteroidetes                                | <i>Bacteroides vulgatus</i>                | 1001175st1_C6_1001175B_160314              | <i>B. vulgatus</i>          |
|               | Actinobacteria                               | <i>Bifidobacterium longum</i>              | 1001175st1_G10_1001175B_160314             | <i>B. longum</i>            |
|               | Firmicutes                                   | <i>Clostridium 1001175sp1</i>              | 1001175st1_A10_1001175B_160314             | <i>Clostridium</i>          |
|               | Firmicutes                                   | <i>Clostridium clostridioforme</i>         | 1001175st1_C5_1001175B_160314              | <i>C. clostridioforme</i>   |
|               | Firmicutes                                   | <i>Clostridium perfringens</i>             | 1001175st1_F9_1001175B_160314              | <i>C. perfringens</i>       |
|               | Firmicutes                                   | <i>Dorea longicatena</i>                   | 1001175st1_H1_1001175B_160314              | <i>D. longicatena</i>       |
|               | Firmicutes                                   | <i>Enterococcus avium</i>                  | 1001175st1_D6_1001175B_160314              | <i>E. avium</i>             |
|               | Proteobacteria                               | <i>Escherichia coli</i>                    | 1001175st1_F3_1001175B_160314              | <i>E. coli</i> F3           |
|               | Proteobacteria                               | <i>Escherichia coli</i>                    | 1001175st2_F4_1001175B_160314              | <i>E. coli</i> F4           |
|               | Proteobacteria                               | <i>Escherichia coli</i>                    | 1001175st3_A2_1001175B_160314              | <i>E. coli</i> A2           |
|               | Firmicutes                                   | <i>Lachnospiraceae 1001136sp1</i>          | 1001175st1_C9_1001175B_160314              | <i>Lachnospiraceae</i>      |
|               | Firmicutes                                   | <i>Lactobacillus 1001175sp1</i>            | 1001175st1_D8_1001175B_160314              | <i>Lactobacillus</i>        |
|               | Bacteroidetes                                | <i>Parabacteroides merdae</i>              | 1001175st1_A1_1001175B_160314              | <i>P. merdae</i>            |
|               | Firmicutes                                   | <i>Roseburia 1001271sp1</i>                | 1001175st1_E3_1001175B_160314              | <i>Roseburia</i>            |
|               | Firmicutes                                   | <i>Ruminococcus 1001175sp1</i>             | 1001175st1_E1_1001175B_160314              | <i>Ruminococcus</i>         |
| Firmicutes    | <i>Streptococcus 1001175sp1</i>              | 1001175st1_H6_1001175B_160314              | <i>Streptococcus</i> H6                    |                             |
| Firmicutes    | <i>Streptococcus 1001283sp2</i>              | 1001175st1_H3_1001175B_160314              | <i>Streptococcus</i> H3                    |                             |
| Firmicutes    | <i>Streptococcus anginosus</i>               | 1001175st1_H11_1001175B_160314             | <i>S. anginosus</i>                        |                             |
| HuLib1271b    | Firmicutes                                   | <i>Anaerofustis stercorihominis</i>        | 1001271st1_D3_1001271B_150615              | <i>A. stercorihominis</i>   |
|               | Bacteroidetes                                | <i>Bacteroides ovatus</i>                  | 1001271st1_H2_1001271B_150615              | <i>B. ovatus</i>            |
|               | Bacteroidetes                                | <i>Bacteroides uniformis</i>               | 1001271st1_A10_1001271B_150615             | <i>B. uniformis</i>         |
|               | Bacteroidetes                                | <i>Bacteroides vulgatus</i>                | 1001271st1_G7_1001271B_150615              | <i>B. vulgatus</i>          |
|               | Actinobacteria                               | <i>Bifidobacterium adolescentis</i>        | 1001271st1_A4_1001271B_150615              | <i>B. adolescentis</i>      |
|               | Actinobacteria                               | <i>Bifidobacterium bifidum</i>             | 1001271st1_H11_1001271B_150615             | <i>B. bifidum</i>           |
|               | Actinobacteria                               | <i>Bifidobacterium longum</i>              | 1001271st1_B4_1001271B_150615              | <i>B. longum</i>            |
|               | Actinobacteria                               | <i>Bifidobacterium pseudocatenulatum</i>   | 1001271st1_F3_1001271B_150615              | <i>B. pseudocatenulatum</i> |
|               | Firmicutes                                   | <i>Clostridium 1001271sp1</i>              | 1001271st1_H5_1001271B_150615              | <i>Clostridium</i>          |
|               | Actinobacteria                               | <i>Collinsella aerofaciens</i>             | 1001271st1_C3_1001271B_150615              | <i>C. aerofaciens</i>       |
|               | Firmicutes                                   | <i>Eubacterium rectale</i>                 | 1001271st1_F12_1001271B_150615             | <i>E. rectale</i>           |
| Firmicutes    | <i>Ruminococcus obeum</i>                    | 1001271st1_E5_1001271B_150615              | <i>R. obeum</i>                            |                             |
| HuLib2780_88b | Bacteroidetes                                | <i>Alistipes shahii</i>                    | BSD2780061688st1_A10_BSD2780061688b_171218 | <i>A. shahii</i>            |
|               | Bacteroidetes                                | <i>Bacteroides caccae</i>                  | BSD2780061688st1_A4_BSD2780061688b_171218  | <i>B. caccae</i>            |
|               | Bacteroidetes                                | <i>Bacteroides ovatus</i>                  | BSD2780061688st1_C6_BSD2780061688b_171218  | <i>B. ovatus</i>            |
|               | Bacteroidetes                                | <i>Bacteroides uniformis</i>               | BSD2780061688st1_G7_BSD2780061688b_171218  | <i>B. uniformis</i>         |
|               | Actinobacteria                               | <i>Bifidobacterium animalis</i>            | BSD2780061688st1_E5_BSD2780061688b_171218  | <i>B. animalis</i>          |
|               | Actinobacteria                               | <i>Bifidobacterium bifidum</i>             | BSD2780061688st1_G1_BSD2780061688b_171218  | <i>B. bifidum</i>           |
|               | Actinobacteria                               | <i>Bifidobacterium longum</i>              | BSD2780061688st2_H1_BSD2780061688b_171218  | <i>B. longum</i>            |
|               | Firmicutes                                   | <i>Clostridium BSD2780061688sp2</i>        | BSD2780061688st1_H5_BSD2780061688b_171218  | <i>Clostridium</i> E5       |
|               | Firmicutes                                   | <i>Clostridium BSD2780061688sp3</i>        | BSD2780061688st1_E8_BSD2780061688b_171218  | <i>Clostridium</i> E8       |
|               | Firmicutes                                   | <i>Clostridium bartlettii</i>              | BSD2780061688st1_A9_BSD2780061688b_171218  | <i>C. bartlettii</i>        |
|               | Firmicutes                                   | <i>Clostridium hylemonae</i>               | BSD2780061688st1_A6_BSD2780061688b_171218  | <i>C. hylemonae</i>         |
|               | Firmicutes                                   | <i>Clostridium perfringens</i>             | BSD2780061688st3_G3_BSD2780061688b_171218  | <i>C. perfringens</i>       |
|               | Firmicutes                                   | <i>Clostridium symbiosum</i>               | BSD2780061688st1_G6_BSD2780061688b_171218  | <i>C. symbiosum</i>         |
|               | Actinobacteria                               | <i>Collinsella aerofaciens</i>             | BSD2780061688st1_F5_BSD2780061688b_171218  | <i>C. aerofaciens</i>       |
|               | Actinobacteria                               | <i>Collinsella species</i>                 | BSD2780061688st1_H8_BSD2780061688b_171218  | <i>C. species</i>           |
|               | Firmicutes                                   | <i>Enterococcus 1001136sp1</i>             | BSD2780061688st2_D3_BSD2780061688b_171218  | <i>Enterococcus</i>         |
|               | Firmicutes                                   | <i>Enterococcus faecalis</i>               | BSD2780061688st3_G10_BSD2780061688b_171218 | <i>E. faecalis</i>          |
| Firmicutes    | <i>Enterococcus faecium</i>                  | BSD2780061688st2_C8_BSD2780061688b_171218  | <i>E. faecium</i>                          |                             |
| Firmicutes    | <i>Pseudoflavonifractor BSD2780061688sp1</i> | BSD2780061688st1_E11_BSD2780061688b_171218 | <i>Pseudoflavonifractor</i>                |                             |

1088

1089

1090 **Table S7. Detailed information about various bacterial strains.**

| <b>Phylum</b> | <b>Species</b>                      | <b>Strain</b>              | <b>Strain Abbreviation</b> |
|---------------|-------------------------------------|----------------------------|----------------------------|
| Bacteroidetes | <i>Bacteroides ovatus</i>           | ATCC®8483                  | <i>B. ovatus E</i>         |
| Bacteroidetes | <i>Bacteroides caccae</i>           | ATCC®43185                 | <i>B. caccae A</i>         |
| Bacteroidetes | <i>Bacteroides caccae</i>           | 1001285I_161205_F12        | <i>B. caccae B</i>         |
| Bacteroidetes | <i>Bacteroides caccae</i>           | BSD3178_07_1176_160815_A7  | <i>B. caccae C</i>         |
| Bacteroidetes | <i>Bacteroides thetaiotaomicron</i> | ATCC®VPI5482               | <i>B. theta. A</i>         |
| Bacteroidetes | <i>Bacteroides thetaiotaomicron</i> | BSD2780_12_0875b_A6        | <i>B. theta. B</i>         |
| Bacteroidetes | <i>Bacteroides thetaiotaomicron</i> | BSD2780_06_1689_150309_F9  | <i>B. theta. C</i>         |
| Bacteroidetes | <i>Bacteroides vulgatus</i>         | ATCC®8482                  | <i>B. vulgatus A</i>       |
| Bacteroidetes | <i>Bacteroides vulgatus</i>         | BSD2780_12_0874b_170522_A7 | <i>B. vulgatus B</i>       |
| Bacteroidetes | <i>Bacteroides vulgatus</i>         | 1001271B_150615_G7         | <i>B. vulgatus C</i>       |
| Bacteroidetes | <i>Parabacteroides johnsonii</i>    | DSMZ_18315                 | <i>P. johnsonii</i>        |
| Bacteroidetes | <i>Bacteroides intestinalis</i>     | DSMZ_17393                 | <i>B. intestinalis</i>     |
| Bacteroidetes | <i>Bacteroides fragilis</i>         | J1001437_171009_C3         | <i>B. fragilis</i>         |

1091

1092
